# Supplementary material for: Long-Term Conditions Questionnaire (LTCQ): initial validation survey among primary care patients and social care recipients in England
Source: PubMed Central journal article supplement (PMC5695378; doi:10.1136/bmjopen-2017-019235), 2017-11-03
Supplement: bmjopen-2017-019235.draft_revisions.pdf [file bmjopen-2017-019235.draft_revisions.pdf]

# BMJ Open

BMJ Open is committed to open peer review. As part of this commitment we make the peer review history of every article we publish publicly available.

When an article is published we post the peer reviewers' comments and the authors' responses online. We also post the versions of the paper that were used during peer review. These are the versions that the peer review comments apply to.

The versions of the paper that follow are the versions that were submitted during the peer review process. They are not the versions of record or the final published versions. They should not be cited or distributed as the published version of this manuscript.

BMJ Open is an open access journal and the full, final, typeset and author-corrected version of record of the manuscript is available on our site with no access controls, subscription charges or pay-per-view fees (<http://bmjopen.bmj.com>).

If you have any questions on BMJ Open's open peer review process please email [editorial.bmjopen@bmj.com](mailto:editorial.bmjopen@bmj.com)

# BMJ Open

## The Long-Term Conditions Questionnaire (LTCQ): initial validation survey among primary care patients and social care recipients in England

|                                 |                                                                                                                                                                                                                                                                                                                                                                                                                                                                                                                                                                                                                                                                                                                                                                                                                                                                                                                                                                                                                                                                                                                                                                                                                                                                                                                                                                                                                                                                                                                                                                                                                    |
|---------------------------------|--------------------------------------------------------------------------------------------------------------------------------------------------------------------------------------------------------------------------------------------------------------------------------------------------------------------------------------------------------------------------------------------------------------------------------------------------------------------------------------------------------------------------------------------------------------------------------------------------------------------------------------------------------------------------------------------------------------------------------------------------------------------------------------------------------------------------------------------------------------------------------------------------------------------------------------------------------------------------------------------------------------------------------------------------------------------------------------------------------------------------------------------------------------------------------------------------------------------------------------------------------------------------------------------------------------------------------------------------------------------------------------------------------------------------------------------------------------------------------------------------------------------------------------------------------------------------------------------------------------------|
| Journal:                        | <i>BMJ Open</i>                                                                                                                                                                                                                                                                                                                                                                                                                                                                                                                                                                                                                                                                                                                                                                                                                                                                                                                                                                                                                                                                                                                                                                                                                                                                                                                                                                                                                                                                                                                                                                                                    |
| Manuscript ID                   | bmjopen-2017-019235                                                                                                                                                                                                                                                                                                                                                                                                                                                                                                                                                                                                                                                                                                                                                                                                                                                                                                                                                                                                                                                                                                                                                                                                                                                                                                                                                                                                                                                                                                                                                                                                |
| Article Type:                   | Research                                                                                                                                                                                                                                                                                                                                                                                                                                                                                                                                                                                                                                                                                                                                                                                                                                                                                                                                                                                                                                                                                                                                                                                                                                                                                                                                                                                                                                                                                                                                                                                                           |
| Date Submitted by the Author:   | 18-Aug-2017                                                                                                                                                                                                                                                                                                                                                                                                                                                                                                                                                                                                                                                                                                                                                                                                                                                                                                                                                                                                                                                                                                                                                                                                                                                                                                                                                                                                                                                                                                                                                                                                        |
| Complete List of Authors:       | <p>Potter, Caroline; University of Oxford, Health Services Research Unit, Nuffield Department of Population Health</p> <p>Batchelder, Laurie; University of Kent Personal Social Services Research Unit,</p> <p>A'Court, Christine; University of Oxford, Nuffield Department of Primary Care Health Sciences</p> <p>Geneen, Louise; University of Oxford, Health Services Research Unit, Nuffield Department of Population Health</p> <p>Kelly, Laura; University of Oxford, Health Services Research Unit, Nuffield Department of Population Health</p> <p>Fox, Diane; University of Kent Personal Social Services Research Unit</p> <p>Baker, Matthew ; Quality and Outcomes of Person-Centred Care Policy Research Unit</p> <p>Bostock, Jennifer; Quality and Outcomes of Person-Centred Care Policy Research Unit</p> <p>Coulter, Angela; University of Oxford, Health Services Research Unit, Nuffield Department of Population Health</p> <p>Fitzpatrick, Ray; University of Oxford, Health Services Research Unit, Nuffield Department of Population Health</p> <p>Forder, Julien; University of Kent, PSSRU; London School of Economics, PSSRU</p> <p>Gibbons, Elizabeth; University of Oxford, Health Services Research Unit, Nuffield Department of Population Health</p> <p>Jenkinson, Crispin; University of Oxford, Health Services Research Unit, Nuffield Department of Population Health</p> <p>Jones, Karen; University of Kent Personal Social Services Research Unit</p> <p>Peters, Michele; University of Oxford, Health Services Research Unit, Nuffield Department of Population Health</p> |
| <b>Primary Subject Heading</b>: | Patient-centred medicine                                                                                                                                                                                                                                                                                                                                                                                                                                                                                                                                                                                                                                                                                                                                                                                                                                                                                                                                                                                                                                                                                                                                                                                                                                                                                                                                                                                                                                                                                                                                                                                           |
| Secondary Subject Heading:      | Health services research                                                                                                                                                                                                                                                                                                                                                                                                                                                                                                                                                                                                                                                                                                                                                                                                                                                                                                                                                                                                                                                                                                                                                                                                                                                                                                                                                                                                                                                                                                                                                                                           |
| Keywords:                       | long-term conditions, chronic illness, patient-reported outcome measure, multi-morbidity, person-centred care                                                                                                                                                                                                                                                                                                                                                                                                                                                                                                                                                                                                                                                                                                                                                                                                                                                                                                                                                                                                                                                                                                                                                                                                                                                                                                                                                                                                                                                                                                      |
|                                 |                                                                                                                                                                                                                                                                                                                                                                                                                                                                                                                                                                                                                                                                                                                                                                                                                                                                                                                                                                                                                                                                                                                                                                                                                                                                                                                                                                                                                                                                                                                                                                                                                    |

1  
2  
3  
4  
5  
6  
7  
8  
9  
10  
11  
12  
13  
14  
15  
16  
17  
18  
19  
20  
21  
22  
23  
24  
25  
26  
27  
28  
29  
30  
31  
32  
33  
34  
35  
36  
37  
38  
39  
40  
41  
42  
43  
44  
45  
46  
47  
48  
49  
50  
51  
52  
53  
54  
55  
56  
57  
58  
59  
60

SCHOLARONE™  
Manuscripts

For peer review only

1  
2  
3 **The Long-Term Conditions Questionnaire (LTCQ): initial validation survey among primary**  
4 **care patients and social care recipients in England**  
5  
6  
7

8 Caroline M Potter<sup>1,5</sup>, Laurie Batchelder<sup>2,4</sup>, Christine A'Court<sup>3</sup>, Louise Geneen<sup>1,4</sup>, Laura Kelly<sup>1,5</sup>, Diane  
9 Fox<sup>2,4</sup>, Matthew Baker<sup>4</sup>, Jennifer Bostock<sup>4</sup>, Angela Coulter<sup>1,4</sup>, Ray Fitzpatrick<sup>1,4,5</sup>, Julien Forder<sup>2,4</sup>,  
10 Elizabeth Gibbons<sup>1,5</sup>, Crispin Jenkinson<sup>1,4</sup>, Karen Jones<sup>2,4</sup>, Michele Peters<sup>1,4</sup>  
11

12  
13 <sup>1</sup> Health Services Research Unit, Nuffield Department of Population Health, University of Oxford, Oxford, UK

14 <sup>2</sup> Personal Social Services Research Unit, School of Social Policy Sociology and Social Research, University of  
15 Kent, Canterbury UK

16 <sup>3</sup> Nuffield Department of Primary Care Health Sciences, University of Oxford, Oxford, UK

17 <sup>4</sup> QORU: Quality and Outcomes of Person-centred Care Policy Research Unit, Department of Health England, UK

18 <sup>5</sup> NIHR Collaboration for Leadership in Applied Health Research and Care (CLAHRC) Oxford, Oxford, UK  
19  
20  
21  
22  
23

24 **Addresses and author positions:**

- 25  
26 1. Health Services Research Unit, Richard Doll Building, Old Road Campus, The University of Oxford,  
27 Roosevelt Drive, Headington, Oxford, OX3 7LF, United Kingdom.  
28

29 Caroline M Potter, Research Officer. Louise Geneen, Research Officer. Laura Kelly, Research Officer.  
30 Angela Coulter, Senior Research Scientist. Ray Fitzpatrick, Professor of Public Health and Primary  
31 Care. Elizabeth Gibbons, Senior Research Scientist. Crispin Jenkinson, Professor of Health Services  
32 Research. Michele Peters, Senior Research Scientist.  
33  
34

- 35 2. Quality and Outcomes of Person-centred Care Policy Research Unit, c/o Personal Social Services  
36 Research Unit, George Allen Wing, Cornwallis Building, University of Kent, Canterbury, Kent, CT2  
37 7NF, United Kingdom.  
38  
39

40 Laurie Batchelder, Research Officer. Diane Fox, Research Officer. Matthew Baker, Research Advisor  
41 and Public Involvement Implementation Group. Jennifer Bostock, Research Advisor and Public  
42 Involvement Implementation Group. Julien Forder, Professor of Economics of Social Policy. Karen  
43 Jones, Assistant Director of PSSRU.  
44

- 45 3. Interdisciplinary Research in Health Sciences, Nuffield Department of Primary Care Health  
46 Sciences, Radcliffe Observatory Quarter, Woodstock Road, Oxford, OX2 6GG, United Kingdom.  
47

48 Christine A'Court, Clinical Researcher and GP.  
49  
50  
51  
52

53 **Correspondence to:** Dr Caroline Potter, [caroline.potter@dph.ox.ac.uk](mailto:caroline.potter@dph.ox.ac.uk), +44 (0)1865 289393  
54

55 **Word count** (Introduction, Methods, Results, Discussion, Conclusions): 4,826  
56  
57  
58  
59  
60

## Abstract

*Objective:* The aim of this study was to validate a new generic patient-reported outcome measure, the Long-Term Conditions Questionnaire (LTCQ), among a diverse sample of health and social care users in England.

*Design:* Cross-sectional validation survey. Data were collected through postal surveys (February 2016 - January 2017). The sample included a health care cohort of patients recruited through primary care practices, and a social care cohort recruited through local government bodies that provide social care services.

*Participants:* 1,211 participants (24% confirmed social care recipients) took part in the study. Health care participants were recruited on the basis of having one of eleven specified LTCs, and social care participants were recruited on the basis of receiving social care support for at least one LTC. The sample exhibited high multi-morbidity, with 93% reporting two or more LTCs and 43% reporting a mental health condition.

*Outcome measures:* The LTCQ's construct validity was tested with reference to the EQ-5D (5-level version), the Self-efficacy for Managing Chronic Disease scale, an Activities of Daily Living scale, and the Bayliss burden of morbidity scale.

*Results:* Low levels of missing data for each item indicate acceptability of the LTCQ across the sample. The LTCQ exhibits high internal consistency (Cronbach's  $\alpha = 0.95$ ) across the scale's 20 items and excellent test-retest reliability (ICC = 0.94, 95% CI 0.93 to 0.95). Associations between the LTCQ and all reference measures were moderate to strong and in the expected directions, indicating convergent construct validity.

*Conclusions:* This study provides evidence for the reliability and validity of the Long-Term Conditions Questionnaire, which has potential for use in both health and social care settings. The LTCQ could meet a need for holistic outcome measurement that goes beyond symptoms and physical function, complementing existing measures to capture fully what it means to live well with LTCs.

**Key words:** long-term conditions, chronic illness, patient-reported outcome measure, multi-morbidity, person-centred care

### Strengths and limitations of this study

- This study is the first psychometric evaluation of the Long-Term Conditions Questionnaire, a new generic patient-reported outcome measure.
- The study included a large survey validation sample of 1,211 health and social care users in England.
- The sample was highly diverse in terms of illness burden and care needs, with 93% reporting multi-morbidity and 43% reporting a mental health condition.
- A limitation was the low response rate achieved among social care users, although this was consistent with previous studies.
- Further validation work among other ethnic groups and in non-English contexts is required since the vast majority of participants were white British.

## INTRODUCTION

Long-term chronic conditions have emerged as a significant challenge to the sustainability of health systems worldwide. Considering the high global burden of long-term conditions (LTCs), their management is a top priority in policy terms.<sup>1,2</sup> In England, around one-quarter of the population lives with at least one LTC, accounting for nearly three-quarters of the cost of health and social care services.<sup>3</sup> In particular the rise of multi-morbidity has highlighted the need for integrated services that can address a person's overall health status and enhance their capacity for living well with their conditions.

Patient-reported outcome measures (PROMs) are essential tools for capturing the impact of illness as experienced by those living with LTCs, and the potential of PROMs for facilitating person-centred care has been recognized for more than a decade.<sup>4</sup> However, there is currently no agreed patient-reported measure for evaluating the intended outcome of person-centred care, which could broadly be described as 'living well' within the overall context of one's health condition(s). 'Living well with LTCs' is a complex construct that encompasses both traditional health-related quality of life (HRQoL) domains (e.g. symptom severity, physical and social functioning, emotional well-being) and more recently recognized domains of importance (e.g. treatment burden, empowerment, confidence in self-management).<sup>5,6</sup> A comprehensive measure for assessing the impacts of LTCs should thus move beyond traditional health-status domains of PROMs to capture a more holistic notion of living well.<sup>7</sup>

While a plethora of condition-specific and generic PROMs exist, both types of measure have shortcomings for capturing what it means to live well with LTCs. In focusing on a single disease category, condition-specific PROMs cannot adequately address the phenomenon of multi-morbidity, where impacts may be cumulative or inter-dependent across all conditions.<sup>8</sup> Standardised generic PROMs such as the EQ-5D<sup>9</sup> and SF-36,<sup>10</sup> while valuable for comparative population-level analyses, are unlikely to capture all issues of importance for people living with LTCs.<sup>11,12</sup> Furthermore, these measures may not be appropriate for long-term monitoring of LTCs, where the objectives of health and social care services may be to maintain well-being and/or to avoid deterioration rather than to achieve major health gains.<sup>13</sup> A further complication arises with the distinction between health-related and social care-related measures,<sup>14</sup> as people with complex needs will potentially draw on both types of services. A measure that is appropriate for both contexts could facilitate the development of person-centred care pathways, which are increasingly recognised as preferable to disease-specific care pathways in the context of multi-morbidity.<sup>15</sup>

The aim of this study was to test and validate a new PROM, the Long-Term Conditions Questionnaire (LTCQ). The LTCQ is intended to be relevant and acceptable for people with single or multiple LTCs (physical and/or mental health conditions), and meaningful for health and social care providers in their capacities for monitoring and improving outcomes in LTCs. Additionally, the LTCQ is intended to be short, easy to interpret, and feasible for use in different clinical settings. It is intended for use both as a tool for monitoring and enhancing individual care, and as a population-level tool for measuring health and social care performance, quality and outcomes. The scope of the LTCQ goes well beyond symptoms and physical function; its content development has been described previously and involved interviews with professional stakeholders,<sup>16</sup> qualitative in-depth interviews with people living with LTCs,<sup>17</sup> and pre-testing (e.g. cognitive interviews, translatability assessment) to refine questionnaire items.<sup>18</sup>

## METHODS

This study was reviewed by England's National Research Ethics Service (NRES) Committee East Midlands – Derby (reference 15/EM/0414). Approvals for the study were granted by the Health Research Authority of England's National Health Service (NHS), and local health and social care organisations linked to participant recruitment sites. Data were collected through two postal surveys (a main survey and a follow-up survey) administered to two cohorts: a health care sample recruited through primary care practices (data collected February 2016 – July 2016), and a social care sample recruited through Local Authorities (LAs) that provide funding for social care services (data collected July 2016 – January 2017). Methods and findings presented below follow STROBE reporting guidelines for cross-sectional studies<sup>19</sup> and COSMIN criteria for reporting measurement properties of health status questionnaires.<sup>20</sup> The latter indicates a minimum sample size of 10 subjects per questionnaire item (i.e. 200 participants for this survey validation study), which exceeds the minimum of 100 subjects required for factor analysis within Classical Test Theory. Owing to the complexity of the construct being measured and the diversity of the target population, the study authors aimed to achieve a minimum sample size of 1000 participants.

### Participant recruitment

For the health care cohort, participants were recruited by fifteen General Practitioner (GP) practices from three regions of England (South East, North West, Yorkshire & Humber). In an effort to recruit a maximally diverse sample, the research team selected practices that served both rural and urban areas, and areas of high and low deprivation. For a participant to be invited into the study, the GP practice confirmed diagnosis of one of eleven specified LTCs: cancer within the last 5 years, chronic back pain, chronic obstructive pulmonary disease (COPD), diabetes, depression, irritable bowel syndrome (IBS), ischaemic heart disease (IHD), multiple sclerosis (MS), osteoarthritis (OA), severe mental health (as defined under the UK Quality and Outcomes Framework,<sup>21</sup> including psychoses, bipolar disorder and schizophrenia), and stroke. The eleven selected conditions were chosen by a panel of PROMs researchers and lay advisors, with the aim of maximising diversity in terms of symptoms, disease trajectory, prevalence, mean age of onset, likelihood of comorbidities, burden of disease, type of health and social care needed, level of self-management and burden of care. Each practice recruited from patient groups representing at least five of the eleven conditions, with some practices asked to prioritise certain conditions that were otherwise under-represented. Recruitment was restricted to those diagnosed more than 12 months previously to ensure that participants had adjusted to their diagnosis and had experienced a range of services and strategies for the management of their LTC(s). Only adults (i.e. 18 years of age and above) able to consent who were able to communicate in English were included, with no upper age limit. A total of 2,983 eligible patients were invited to participate for the health care cohort (approximately 200 study packs mailed out by each participating GP practice).

For the social care cohort, participants were recruited by four Local Authorities of different types (unitary, metropolitan, county and London borough) in geographically diverse regions (North West, East of England, South West and Greater London) representing a mix of urban and rural communities. Individuals were eligible for the study if they received fully or partially funded long-term social care support, provided that the primary reason for support was a physical disability, sensory impairment, or a mental health condition as listed in table LTS001b on the Short and Long

1  
2  
3 Term (SALT) mandatory data returns for social care.<sup>22</sup> Potential participants were eligible if they  
4 received community-based services, were at least 18 years old, and were able to communicate in  
5 English. Individuals who received nursing or residential care, whose primary reason of support was a  
6 learning disability or cognitive impairment (as listed on Table LTS001b of SALT), or whose records  
7 indicated that they lacked mental capacity to consent to research were excluded. The research team  
8 provided each Local Authority with study packs, which were mailed directly by the LAs to 2,294  
9 eligible participants. This was to ensure that no personal data of individuals were disclosed to the  
10 research team without consent.  
11  
12

### 13 14 **The surveys**

15 The study packs contained an invitation letter from the GP / LA, a participant information sheet, and  
16 the main survey (Survey 1). Survey 1 included the Long-Term Conditions Questionnaire (LTCQ – see  
17 Table 2 for description of items) and other measures for testing the LTCQ's construct validity: EQ-5D  
18 (5-level version including the EQ-VAS),<sup>23</sup> the Self-efficacy for Managing Chronic Disease 6-item  
19 scale,<sup>24</sup> an Activities of Daily Living scale,<sup>25</sup> and the Bayliss burden of morbidity scale (adapted with  
20 permission from the developers to include all conditions for which participants in this study had  
21 been recruited).<sup>26</sup> These were selected because they measure different domains that were  
22 hypothesized to underpin the LTCQ's broad construct of 'living well with LTCs': physical functioning,  
23 symptom burden and emotional well-being (EQ-5D); confidence to self-manage (Self-efficacy scale),  
24 functioning and independence (ADLs), cumulative impact of LTCs (Bayliss scale). Survey 1 also  
25 included demographic questions, questions on service use, a question about help needed to  
26 complete the questionnaire, and a box for free-text comments. Additionally for the social care  
27 cohort, Survey 1 included a measure of social care-related quality of life, the Adult Social Care  
28 Outcomes Toolkit (ASCOT),<sup>27</sup> but this measure is not included in the initial validation analysis for the  
29 total sample. A pre-paid, addressed return envelope was provided in all study packs. After  
30 approximately two weeks participants were sent a thank you / reminder letter from the GP / LA in  
31 order to encourage further responses.  
32  
33  
34  
35  
36  
37

38 Survey 1 contained an address slip through which respondents could express willingness to receive  
39 the follow-up survey (Survey 2). Among those who provided contact details (n = 980, 81%), a sub-  
40 sample of 693 respondents (57%) were sent Survey 2 approximately two weeks after returning  
41 Survey 1. The sub-sample included 54% of the health care cohort (n = 499) and 66% of the social care  
42 cohort (n = 194). Survey 2 contained only the LTCQ, a reduced number of demographics questions,  
43 and a health transition question asking about changes in health status during the period between  
44 completing Survey 1 and Survey 2. A pre-paid, addressed return envelope was provided with all  
45 questionnaires. Participants who had not returned Survey 2 within approximately two weeks were  
46 sent a reminder letter.  
47  
48  
49

### 50 51 **Analysis**

52 All data were entered into SPSS (version 24), a statistical software package. A coding framework was  
53 specified in advance and used by all research team members for consistency in data entry. Data  
54 cleaning was undertaken via analysis of frequencies for all items in Survey 1, with any anomalies  
55 checked against the original questionnaires and corrected as necessary. Particular attention was  
56 given to the 20 items of the LTCQ, for which any missing or multiple responses prompted visual  
57  
58  
59  
60



1  
2  
3 inspection and verification/correction of data for the entire Survey 1 questionnaire. The same  
4 procedure for data entry, checking and cleaning was followed for Survey 2 among the health cohort,  
5 and for both Survey 1 and Survey 2 among the social care cohort, to ensure data quality across the  
6 full dataset.  
7

8  
9  
10 Exploratory factor analysis of the 20 LTCQ items was undertaken (see Results), from which it was  
11 concluded that the LTCQ could be scored as a single composite measure. The appropriateness of  
12 scoring items as a single scale was further evaluated through examination of inter-item correlations  
13 (acceptable if 0.8 or less) and item-total correlations (acceptable if 0.3 or more).<sup>28</sup> LTCQ items were  
14 scored on a scale from 0 (most negative response) to 4 (most positive response). Items 9-15 are  
15 negatively phrased and were therefore reverse-scored. Taking a conservative approach and  
16 following best practice guidelines,<sup>29</sup> only responses for which all 20 LTCQ items had been answered  
17 were included in the initial validation analysis. A sum of the 20 item scores was calculated and  
18 recalibrated to give an overall LTCQ score ranging from 0 to 100, with higher scores indicating a  
19 better level of 'living well with LTCs'. Cronbach's alpha ( $\alpha$ ) was calculated as a measure of internal  
20 consistency of the scale. Test-retest reliability was assessed via calculation of the Intraclass  
21 Correlation Coefficient (ICC) type 2 (two-way random effects, absolute agreement) among  
22 respondents who reported no change in health status between Survey 1 and Survey 2. ANOVA was  
23 employed to compare LTCQ scores among sub-groups within the sample (i.e. by gender, age, health  
24 versus social care cohort, mental versus physical health conditions, number of conditions reported).  
25  
26  
27  
28  
29

30 Scores for all existing measures were calculated according to developers' instructions. For the EQ-  
31 5D-5L, value sets recently reported for a population in England were used to calculate a single index  
32 value for each participant's reported health state;<sup>30</sup> scores are only calculated if all five items have  
33 been completed, with a theoretical range of -0.28 (a state worse than death) to 1 (best possible  
34 health state). The EQ-VAS score, a measure of overall health on that day, ranges from 0 (the worst  
35 health you can imagine) to 100 (the best health you can imagine). For the Self-efficacy measure, six  
36 items asked about confidence in doing certain health-related activities on a scale from 1 (not at all  
37 confident) to 10 (totally confident); the overall score is calculated as the mean of item scores,  
38 provided that participants had completed at least four of the six items. The ADL score is calculated as  
39 the sum of all items for which difficulty in managing daily activities was reported, ranging from 0 (no  
40 difficulty with any listed activities) to 13 (at least some difficulty with all listed activities). The Bayliss  
41 burden of morbidity measure lists 25 LTCs and asks respondents to indicate the impact of each  
42 condition on their lives; a score of 0 indicates that the respondent does not have that condition,  
43 while scores for individual items ranging from 1 (has the condition but it does not limit daily  
44 activities at all) to 5 (has the condition and it limits daily activities a lot) indicates the impact of any  
45 reported condition. The total morbidity score was calculated as the sum of impact scores for all  
46 conditions reported, including up to three LTCs that respondents could list as 'other long-term  
47 conditions not mentioned above'. A count function was applied to the morbidity measure to  
48 calculate the number and type (physical or mental health) of LTCs reported by each respondent. For  
49 assessment of construct validity, correlations (Spearman's rho) were calculated for the LTCQ score in  
50 relation to all other measures.  
51  
52  
53  
54  
55  
56  
57  
58  
59  
60

## RESULTS

### Sample characteristics

A total of 917 participants were recruited through primary care (31% response rate), and 294 participants were recruited through social care (13% response rate), giving a total sample of 1,211 participants (23% overall response rate). Demographic information is shown in Table 1. The age range was 18 to 102 years, with a mean age of 67 (SD 15.3 years). Fifty-four percent (n = 656) were female, just over half were married or in a civil partnership (n = 648, 54%), and just under half were fully retired from work (n = 554, 46%). The sample was mainly white British (n = 1,097, 91%), with limited representation from non-white groups. Although participants were recruited on the basis of having one LTC, the sample exhibited a high degree of multi-morbidity; 1,124 participants (93%) reported having two or more conditions, with a mean of 6.2 LTCs (SD 3.8 LTCs) reported across the sample. 522 participants (43%) reported at least one mental health condition, with the majority of these also reporting at least one physical LTC.

### Acceptability

The LTCQ was completed in full by 1,082 participants, which enabled calculation of an LTCQ score for 89% of the sample. Table 2 summarises the content and Survey 1 response rates for individual items. Levels of missing data were low and broadly uniform across items, ranging from 1.0% (item 10, dependence; item 11, loneliness; item 20, living life as you want) to 2.2% (item 13, services difficult to cope with). The low levels of missing data for all individual items indicate acceptability of the LTCQ within this diverse sample.

### Floor / ceiling effects

For the total sample responses were generally skewed towards positive answers, with ceiling effects (i.e. less than 5% and more than 40% of respondents endorsing the most negative and positive response options, respectively)<sup>28</sup> observed in five items of the LTCQ (items 6, 7, 13, 14, and 18 – see Table 2). Ceiling effects were most pronounced for item 6 (home suitability) and item 7 (safety at home). These items convey content that was identified during previous qualitative phases of research as especially important for social care users, who represent a smaller portion of the sample. Whilst it is worth noting these item-level ceiling effects for their potential implications in population-level analyses, they are not in themselves problematic given the LTCQ's potential use for individual-level monitoring, where a key aim would be to identify and support the relatively smaller proportion of respondents who selected negative response options. No ceiling effect was observed for the measure as a whole (i.e. 15% or more of respondents achieving the highest possible score),<sup>20</sup> as less than 4% of respondents scored 100 on the LTCQ.

### Factor analysis

The dataset's suitability for factor analysis was assessed via Bartlett's test of sphericity (highly significant,  $p < 0.001$ ), the Kaiser-Meyer-Olkin (KMO) measure of sampling adequacy (0.96), and measures of sampling adequacy (MSA) (above 0.9 for each item). Exploratory factor analysis was undertaken using principal axis factoring (PAF). Three factors were extracted via the Kaiser criterion (eigenvalue  $> 1$ ), which explained 66% of variance: factor 1 (eigenvalue 10.9, explaining 55% of variance), factor 2 (eigenvalue 1.2, explaining 6.0% of variance), factor 3 (eigenvalue 1.1, explaining

1  
2  
3 5.6% of variance). Over-extraction of factors is a recognised problem using this method,<sup>31,32</sup> and  
4 examination of the scree plot suggested that only the first factor should be retained. This was  
5 confirmed by Parallel Analysis,<sup>31</sup> which showed only the first factor with an eigenvalue exceeding the  
6 corresponding value generated for a random data matrix of the same size (20 items x 1082  
7 respondents). For the one-factor solution, 19 LTCQ items loaded onto the general factor at levels  
8 ranging from 0.58 (good) to 0.86 (excellent),<sup>33</sup> with item 16 (knowledge about health conditions)  
9 loading less strongly (0.35). This evidence supports the LTCQ being scored as a single scale.  
10  
11

12 To check against under-extraction of factors, three-factor solutions (indicated by the Kaiser criterion)  
13 were also examined. With orthogonal (Varimax) rotation, all 20 items loaded onto one of the three  
14 factors with a minimum loading of 0.35 (item 16; all other items loaded at 0.49 or higher), and  
15 fourteen items cross-loaded onto additional factor(s). When oblique rotation (Direct Oblimin) was  
16 applied, the same pattern of primary loadings was observed across the three factors, with two items  
17 (item 10, dependence; item 19, confidence to manage illness) also loading weakly onto another  
18 factor. In this analysis the three factors correlated substantially with each other ( $r > 0.6$  for all factor  
19 combinations), suggesting difficulty with interpreting and labelling the factors as distinct subscales.  
20 An examination of items within factors indicated that each factor contained multiple concepts; for  
21 example whilst factor 3 appeared to broadly group social and environmental influences on the  
22 management of LTCs, it contained conceptually distinct items on safety, suitability of the home, and  
23 social support. This observation is consistent with the conceptual framework from which items were  
24 developed,<sup>17</sup> in which 15 distinct concepts underpinned the 20 items tested in the initial validation  
25 survey. The items within each factor were summed and calibrated to yield dimension scores ranging  
26 from 0-100, which were suitable for factor analysis (Bartlett's test highly significant, KMO and MSA  
27 values all above 0.6). Higher-order factor analysis was undertaken using PAF and the Kaiser criterion;  
28 one factor was extracted with an eigenvalue of 2.3 that explained 75% of variance, with factor  
29 loadings of 0.93, 0.84, and 0.82. Thus the appropriateness of scoring the LTCQ as a single composite  
30 measure that captures the broad construct of 'living well with LTCs' was confirmed.  
31  
32  
33  
34  
35  
36  
37  
38

### 39 **Internal consistency**

40 The LTCQ exhibits high internal consistency across its 20 items (Cronbach's  $\alpha = 0.95$ ). Corrected  
41 item-total correlations ranged from 0.35 (item 16, knowledge about health conditions) to 0.83 (item  
42 4, felt in control of daily life), with negligible improvement in  $\alpha$  if responses to item 16 were deleted.  
43 An examination of inter-item correlations showed that with one exception (item 3, able to be  
44 physically active and item 5, able to take part in enjoyable activities,  $r = 0.83$ ), associations between  
45 items were moderate rather than strong. No items were considered duplicates of other items and all  
46 items contributed substantially to the single scale; thus no items were deleted following initial  
47 analysis.  
48  
49  
50

### 51 **Test-retest reliability**

52 Of 693 participants sent the follow-up questionnaire, 544 (78%) completed and returned Survey 2.  
53 LTCQ scores for the 383 participants (70%) who reported their health as 'about the same' as two  
54 weeks ago were analysed for test-retest reliability. The ICC (type 2: two-way random effects,  
55 absolute agreement) for overall LTCQ scores between Survey 1 and Survey 2 was 0.94 (95% CI, 0.93  
56 to 0.95). Correlations for individual item responses between Survey 1 and Survey 2 were examined  
57  
58  
59  
60

1  
2  
3 and found to be moderate or strong and significant for all items, ranging from 0.50 (item 16,  
4 knowledge about health conditions) to 0.83 (item 2, able to fulfil responsibilities). Frequencies of  
5 Survey 2 responses were examined and found to follow the same pattern of skewing towards the  
6 most positive response options as for Survey 1. Levels of missing data were similarly low (less than  
7 2% missing for each item) for Survey 2 as for Survey 1, and high internal consistency of the scale ( $\alpha =$   
8 0.96) was again observed for Survey 2 responses with complete LTCQ data (N=492).  
9  
10

### 11 **Sub-sample comparisons**

12 The size and diversity of the sample enabled the comparison of LTCQ scores among different groups.  
13 Tables 3a and 3b present LTCQ score parameters and internal consistency measures for groups  
14 compared by cohort (health or social care), gender, age, number of conditions reported, and  
15 presence or absence of a mental health condition. ANOVA confirmed statistically significant  
16 differences in mean scores in a predictable pattern: LTCQ scores were lower for the social care  
17 cohort, women, the youngest (under 50) and oldest (over 85) age groups, high multi-morbidity (8 or  
18 more conditions reported), and the presence of at least one mental health condition. Internal  
19 consistency was high ( $\alpha > 0.9$ ) for all groups. The analysis was repeated for responses to the follow-  
20 up survey (N=492), with the same pattern observed. Distributions of LTCQ scores by cohort and  
21 mental health are shown in Figure 1.  
22  
23  
24  
25  
26  
27

### 28 **Convergent construct validity**

29 The sample's mean scores for the LTCQ, EQ-5D-5L, EQ-VAS, Self-efficacy scale, Activities of Daily  
30 Living (ADL) scale, and Bayliss burden of morbidity scale are shown in Table 4, alongside correlations  
31 (Spearman's rho) of the LTCQ score with all other measures. Associations between the LTCQ and all  
32 reference measures were moderate to strong and in the expected directions, i.e. positive for  
33 measures where higher scores indicated better outcomes (EQ-5D-5L, EQ-VAS, Self-efficacy scale),  
34 and negative for measures where higher scores indicated poorer outcomes (ADLs, Bayliss burden of  
35 morbidity). The collective strengths of association are notable given the different domains being  
36 captured across the measures (e.g. physical and emotional functioning, confidence to self-manage,  
37 impact of LTCs on daily activities). Further item-level analyses are ongoing, but initial results suggest  
38 that while some LTCQ items correlate with specific items from reference measures, other LTCQ  
39 items seem to be tapping into distinct domains that underpin the broader construct of 'living well  
40 with LTCs'. For example responses to LTCQ items reflecting personal autonomy (e.g. items 1-5) are  
41 associated with responses to mobility, self-care and usual activities items from the EQ-5D; and LTCQ  
42 items reflecting illness burden (items 9-15) are associated with the EQ-5D depression/anxiety item;  
43 but LTCQ items reflecting social and environmental influences on the impact of LTCs (e.g. social  
44 support, suitability of the home) are not strongly associated with items from existing measures.  
45 Taken together this evidence indicates that the LTCQ score represents a more complex construct of  
46 'living well with LTCs' that draws together domains from multiple existing measures.  
47  
48  
49  
50  
51  
52  
53  
54

## 55 **DISCUSSION**

56 The LTCQ is a new generic PROM for capturing what it means to live well with long-term conditions.  
57 In this study the LTCQ was found to be acceptable to a large and diverse sample of health and social  
58  
59  
60

1  
2  
3 care users (N=1,211), with low levels of missing data across all items. For initial analysis an LTCQ  
4 score was only computed if all items were completed; but given that 98% of the sample completed  
5 18 items (90%) or more of the LTCQ, further work will explore the feasibility of imputing scores when  
6 one or two LTCQ items are missing. Internal consistency of the LTCQ is high, but analysis has not  
7 indicated direct repetition of content between items; this is consistent with the conceptual  
8 framework from which it was developed,<sup>17</sup> in which 15 distinct concepts underpinned the 20 items.  
9 Correlations with all reference measures (EQ-5D-5L, EQ-VAS, Self-efficacy scale, ADLs, Bayliss burden  
10 of morbidity) were strong and in the expected directions, supporting construct validity. Among this  
11 sample the LTCQ exhibited excellent test-retest reliability.  
12  
13

14  
15 A strength of the study was the sample's diversity in the number, type and severity of health  
16 conditions reported, which indicates that the LTCQ is relevant for use across different types of LTCs.  
17 The potentially wide applicability of the LTCQ suggests that it could play a role in operationalising  
18 integrated person-centred care, with particular relevance for people with multi-morbidity. That  
19 social care users have been specifically included in the sample is a further strength, suggesting that  
20 the LTCQ may be relevant for use in both health and social care settings. The range of reference  
21 measures used to validate the LTCQ is a third strength, demonstrating the complexity of 'living well  
22 with LTCs' that the LTCQ aims to measure, which is not fully captured by other existing measures.  
23  
24

25  
26 Weaknesses of the study include the lower response rate achieved among the social care cohort and  
27 the relative homogeneity of the sample in terms of ethnicity. The response rate for the health care  
28 cohort (31%) was broadly in line with that of a previous pilot study<sup>13</sup> and other national health  
29 surveys.<sup>8,34</sup> The lower response rate for the social care cohort (13%), who reported lower levels of  
30 'living well' in comparison to the health care cohort, may indicate less willingness or ability to  
31 engage with PROMs in comparison to other groups. These findings are not entirely unexpected given  
32 the similarity of this response rate to those of other projects assessing social care recipients.<sup>35</sup>  
33 Because the vast majority of participants in this study were white British, further testing is  
34 recommended to assess the relevance and acceptability of the LTCQ in other ethnic groups.  
35  
36

37  
38 The LTCQ provides a more holistic approach to outcome measurement, encompassing but moving  
39 beyond the focus on symptoms and functioning seen in existing generic health status measures such  
40 as the EQ-5D. The strong correlations of LTCQ scores with both the EQ-5D and the Self-efficacy scale  
41 suggest that the broad construct measured by the LTCQ captures both functional abilities and self-  
42 confidence to manage illness, among other domains. The availability of a valid, generic measure for  
43 monitoring the cumulative impacts of LTCs could play a key role in facilitating the shift to new  
44 models of person-centred care. Crucial to emerging goals for redesigned services is individuals'  
45 capabilities for managing the many demands of living with LTCs. Equally important is the extent to  
46 which people have positive self-worth and are able to participate in society through meaningful and  
47 rewarding activities, including employment. In line with current policy,<sup>36,37</sup> a generic PROM for LTCs  
48 should also assess key aspects of relevance to social care including safety, control over life and  
49 quality of support – concepts that are included in the LTCQ. In drawing together a unique range of  
50 health- and social care-related items, the LTCQ fills a distinct gap in the availability of measures that  
51 are appropriate for evaluating integrated services in the context of multi-morbidity.  
52  
53  
54

55  
56 A focus of future research will be to test the responsiveness of the LTCQ, which will be crucial for its  
57 potential use in routine monitoring. Furthermore, whilst this initial validation study has  
58  
59  
60

1  
2  
3 demonstrated the LTCQ's relevance for people with a diverse range of LTCs (including multi-  
4 morbidity), further validation work is needed in populations not represented here, for example  
5 those with dementia or learning difficulties, and those for whom English is not their first language.  
6 Translatability assessment of the LTCQ was undertaken during an earlier phase of its development<sup>18</sup>  
7 and concluded that it could be translated into multiple languages (e.g. French, Polish, Arabic, Urdu,  
8 simplified Chinese). Following translation, the acceptability, validity and reliability of the LTCQ would  
9 need to be tested through further studies in non-English contexts. Further structural validation work,  
10 for example employing Rasch analysis or bifactor models, would also contribute to the evidence  
11 base for this new measure.  
12  
13

## 14 15 16 **CONCLUSIONS**

17 This paper provides encouraging evidence for the reliability and validity of the Long-Term Conditions  
18 Questionnaire (LTCQ), a new instrument for measuring 'living well' in the context of chronic illness.  
19 As a generic PROM that taps into a broad range of domains relevant for both health and social care  
20 settings, the LTCQ could meet a distinct need for holistic outcome measurement that facilitates  
21 integrated service provision. The measure's reliability among all sub-groups within this diverse  
22 validation sample, coupled with previously reported evidence of content validity,<sup>18</sup> indicates that the  
23 LTCQ is relevant and acceptable for people with single or multiple LTCs, encompassing both physical  
24 and mental health conditions. In the context of increasing multi-morbidity, a generic PROM that  
25 comprehensively captures what it means to live well with LTCs from the individual's perspective  
26 could support the implementation of person-centred care.  
27  
28  
29  
30  
31

## 32 **ACKNOWLEDGEMENTS**

33 We thank the participants with long-term conditions for taking part in this study, and all of the  
34 organisations who helped us to recruit participants. We also thank Ann-Marie Towers for her  
35 assistance with the development of the LTCQ, and we thank Jane Dennett, Ed Ludlow and Alan  
36 Dargan for supporting the social care research team during recruitment.  
37  
38  
39

## 40 **COMPETING INTERESTS**

41 All authors declare: some authors had financial (salary) support from the two funding bodies listed  
42 below for the submitted work; no financial relationships with any other organisations that might  
43 have an interest in the submitted work in the previous three years; no other relationships or  
44 activities that could appear to have influenced the submitted work.  
45  
46  
47

## 48 **FUNDING**

49 This research was funded by the Policy Research Programme (PRP) in the Department of Health  
50 England, which supports the Quality and Outcomes of Person-centred Care Policy Research Unit  
51 (QORU), and by the National Institute for Health Research (NIHR) Collaboration for Leadership in  
52 Applied Health Research and Care (CLAHRC) Oxford at Oxford Health NHS Foundation Trust. The  
53 views expressed are those of the authors and not necessarily those of the NHS, the NIHR or the  
54 Department of Health.  
55  
56  
57  
58  
59  
60



### AUTHOR CONTRIBUTIONS

RF, JF, AC, CJ and MP conceived the study. RF and JF secured its funding and managed its overall direction. JB and MB contributed to study design, ethics considerations and interpretation of study results as patient/public members of the research team. MP, LB and KJ led on securing ethics and other approvals for the study. AC, EG and CJ advised on data collection and data interpretation throughout the study. MP, CP, LB, LG, CA, LK, DF and KJ were jointly responsible for participant recruitment (including working with participating organisations and developing the database search protocol) and for all aspects of data management (collection, entry, checking). CP and MP led the analysis with direction from RF and CJ. CP drafted the paper, which was critically reviewed by all authors. All authors contributed to revisions and approved the final version of the manuscript.

### DATA SHARING STATEMENT

As stated in the approved study protocol, only members of the research team (i.e. study authors) have access to the study data. The full anonymised data set was shared between all team members (University of Oxford and University of Kent). Direct access will be granted to authorised representatives from the Sponsor or host institution for monitoring and/or audit of the study to ensure compliance with regulations.

### REFERENCES

1. Barnett K, Mercer SW, Norbury M, Watt G, Wyke S, Guthrie B. Epidemiology of multimorbidity and implications for health care, research, and medical education: a cross-sectional study. *Lancet*. 2012;380(9836):37-43.
2. World Health Organization. Global status report on noncommunicable diseases. Geneva: WHO Press; 2014. Available from: <http://www.who.int/nmh/publications/ncd-status-report-2014/en/>
3. Department of Health England. Long Term Conditions Compendium of Information: Third Edition. Epub 2012 May 30. Available from: [https://www.gov.uk/government/uploads/system/uploads/attachment\\_data/file/216528/dh\\_134486.pdf](https://www.gov.uk/government/uploads/system/uploads/attachment_data/file/216528/dh_134486.pdf)
4. Marshall S, Haywood K, Fitzpatrick R. Impact of patient-reported outcome measure on routine practice: a structured review. *J Eval Clin Prac* 2006;12(5):559-568.
5. Morgan HM, Entwistle VA, Cribb A, Christmas S, Owens J, Skea ZC, et al. We need to talk about purpose: a critical interpretive synthesis of health and social care professionals' approaches to self-management support for people with long-term conditions. *Health expectations: an international journal of public participation in health care and health policy*. 2016;20:243-259.
6. Entwistle VA, Cribb A, Owens J. Why Health and Social Care Support for People with Long-Term Conditions Should be Oriented Towards Enabling Them to Live Well. *Health Care Anal*. Epub 2016 Nov 28.
7. Makai P, Brouwer WBF, Koopmanschap MA, Stolk EA, Nieboer AP. Quality of life instruments for economic evaluation in health and social care for older people : A systematic review. *Soc Sci Med*. 2014;102:83-93.

- 1
  - 2
  - 3
  - 4
  - 5
  - 6
  - 7
  - 8
  - 9
  - 10
  - 11
  - 12
  - 13
  - 14
  - 15
  - 16
  - 17
  - 18
  - 19
  - 20
  - 21
  - 22
  - 23
  - 24
  - 25
  - 26
  - 27
  - 28
  - 29
  - 30
  - 31
  - 32
  - 33
  - 34
  - 35
  - 36
  - 37
  - 38
  - 39
  - 40
  - 41
  - 42
  - 43
  - 44
  - 45
  - 46
  - 47
  - 48
  - 49
  - 50
  - 51
  - 52
  - 53
  - 54
  - 55
  - 56
  - 57
  - 58
  - 59
  - 60
8. Mujica-Mota RE, Roberts M, Abel G, Elliott M, Lyratzopoulos G, Roland M, et al. Common patterns of morbidity and multi-morbidity and their impact on health-related quality of life : evidence from a national survey. *Qual Life Res.* 2015;24:909-918.
  9. The EuroQol Group. EuroQol – a new facility for the measurement of health-related quality of life. *Health Policy.* 1990;16:199-208.
  10. Ware JE, Sherbourne CD. The MOS 36-Item Short-Form Health Survey (SF-36): Conceptual Framework and Item Selection. *Med Care.* 1992;30(6):473-483.
  11. Matza LS, Boye KS, Stewart KD, Curtis BH, Reaney M, Landrian AS. A qualitative examination of the content validity of the EQ-5D-5L in patients with type 2 diabetes. *Health Qual Life Outcomes.* 2015;13:192.
  12. Coulter A. Measuring what matters to patients. *BMJ* 2017;356:j816. Epub 2017 Feb 20.
  13. Peters M, Crocker H, Dummett S, Jenkinson C, Doll H, Fitzpatrick R. Change in health status in long-term conditions over a one year period : a cohort survey using patient-reported outcome measures. *Health Qual Life Outcomes* 2014;12:123.
  14. Forder JE, Caiels J. Measuring the outcomes of long-term care. *Soc Sci Med.* 2011;73:1766-1774.
  15. Røsstad T, Garåsen H, Steinsbekk A, Sletvold O, Grimsmo A. Development of a patient-centred care pathway across healthcare providers: a qualitative study. *BMC Health Serv Res.* 2013;13:121.
  16. Hunter C, Fitzpatrick R, Jenkinson C, Darlington AE, Coulter A, Forder JE, et al. Perspectives from health, social care and policy stakeholders on the value of a single self-report outcome measure across long-term conditions: a qualitative study. *BMJ Open.* 2015;5:e006986.
  17. Peters M, Potter CM, Kelly L, Hunter C, Gibbons E, Jenkinson C, et al. The Long-Term Conditions Questionnaire : conceptual framework and item development. *Patient Related Outcome Measures.* 2016;7:109-125.
  18. Kelly L, Potter CM, Hunter C, Gibbons E, Fitzpatrick R, Jenkinson C, et al. Refinement of the Long-Term Conditions Questionnaire (LTCQ): patient and expert stakeholder opinion. *Patient Related Outcome Measures.* 2016;7:183-193.
  19. von Elm E, Altman DG, Egger M, Pocock SJ, Gøtzsche PC, Vandenbroucke JP; STROBE Initiative. The Strengthening the Reporting of Observational Studies in Epidemiology (STROBE) statement: guidelines for reporting observational studies. *J Clin Epidemiol.* 2008;61(4):344-349.
  20. Terwee CB, Bot SDM, de Boer MR, van der Windt DAWM, Knol DL, Dekker J, et al. Quality criteria were proposed for measurement properties of health status questionnaires. *J Clin Epidemiol.* 2007;60:34-42.
  21. NHS Digital. Quality and Outcomes Framework. Epub 2016. Available from : <http://content.digital.nhs.uk/qof>
  22. NHS Digital (2016) Short and Long-term Support (SALT) 2016. Available from: <http://content.digital.nhs.uk/datacollections/SALT>
  23. Herdman M, Gudex C, Lloyd A, Janssen MF, Kind P, Parkin D, et al. Development and preliminary testing of the new five-level version of EQ-5D (EQ-5D-5L). *Quality Life Res.* 2011;20(10):1727-1736.
  24. Lorig KR, Sobel DS, Ritter PL, Laurent D, Hobbs M. Effect of a self-management program on patients with chronic disease. *Eff Clin Pract.* 2001;4:256-262.



- 1  
2  
3 25. Blake M, Gray M, Balarajan M, Darton R, Hancock R, Henderson C, et al. Social care for older  
4 people aged 65+: Questionnaire documentation. NatCen Social Research. Epub 2010.  
5 Available from: <http://www.natcen.ac.uk/media/205502/social-care-questionnaire.pdf>  
6  
7 26. Bayliss EA, Ellis JL, Steiner JF. Subjective assessments of comorbidity correlate with quality of  
8 life health outcomes: Initial validation of a comorbidity assessment instrument. *Health Qual  
9 Life Outcomes* 2005;3:51.  
10  
11 27. Netten A, Burge P, Malley J, Potoglou D, Towers A, Brazier J, et al. Outcomes of Social Care  
12 for Adults: Developing a Preference-Weighted Measure. *Health Technology Assessment*.  
13 2012;16(16):1-165. Available from: <http://dx.doi.org/10.3310/hta16160>  
14  
15 28. Petrillo J, Cano SJ, McLeod LD, Coon CD. Using Classical Test Theory, Item Response Theory,  
16 and Rasch Measurement Theory to evaluate patient-reported outcome measures: a  
17 comparison of worked examples. *Value in Health*. 2015;18:25-34.  
18  
19 29. Streiner DL, Norman GR, Cairney J. *Health measurement scales: a practical guide to their  
20 development and use*, 5<sup>th</sup> edition. 2015;Oxford: Oxford University Press.  
21  
22 30. Devlin N, Shah K, Feng Y, Mulhern B, van Hout B. Valuing health-related quality of life: An  
23 EQ-5D-5L value set for England. Office of Health Economics Research, Research Paper 16/01.  
24 Epub January 2016. Available from: [https://www.ohe.org/publications/valuing-health-  
25 related-quality-life-eq-5d-5l-value-set-england](https://www.ohe.org/publications/valuing-health-related-quality-life-eq-5d-5l-value-set-england)  
26  
27 31. Franklin SB, Gibson DJ, Robertson PA, Pohlmann JT, Fralish JS. Parallel Analysis: A method for  
28 determining significant principal components. *Journal of Vegetation Science*. 1995;6:99-106.  
29  
30 32. Reise SP, Waller NG, Comrey AL. Factor analysis and scale revision. *Psychological  
31 Assessment*. 2000;12:287-297.  
32  
33 33. Comrey AL, Lee HB. *A first course in factor analysis*, 2<sup>nd</sup> edition. Hillsdale, NJ: Lawrence  
34 Erlbaum.  
35  
36 34. Ipsos MORI on behalf of NHS England. GP Patient Survey – National summary report. Epub  
37 2016 July 7. Available from : [http://gp-survey-  
38 production.s3.amazonaws.com/archive/2016/July/July2016NationalSummaryReport.pdf](http://gp-survey-production.s3.amazonaws.com/archive/2016/July/July2016NationalSummaryReport.pdf)  
39  
40 35. Forder J, Malley J, Rand S, Vadean F, Jones K, Netten A. Identifying the impact of adult social  
41 care (IIASC report): Interpreting outcome data for use in the Adult Social Care Outcomes  
42 Framework. Personal Social Services Discussion Paper 2892, University of Kent, Canterbury.  
43 Epub 2016 January. Available from: <http://www.pssru.ac.uk/archive/pdf/4633.pdf>  
44  
45 36. Department of Health England. NHS Outcomes Framework: at-a-glance. Epub 2016 April.  
46 Available from:  
47 [https://www.gov.uk/government/uploads/system/uploads/attachment\\_data/file/513157/N  
48 HSOF\\_at\\_a\\_glance.pdf](https://www.gov.uk/government/uploads/system/uploads/attachment_data/file/513157/NHSOF_at_a_glance.pdf)  
49  
50 37. Adult Social Care Statistics, NHS Digital. Measures from the Adult Social Care Outcomes  
51 Framework England 2015-16. Epub 2016 Oct 5. Available from:  
52 [http://www.content.digital.nhs.uk/catalogue/PUB21900/meas-from-asc-of-eng-1516-  
53 Report.pdf](http://www.content.digital.nhs.uk/catalogue/PUB21900/meas-from-asc-of-eng-1516-Report.pdf)  
54  
55  
56  
57  
58  
59  
60

Table 1. Participant characteristics (N=1,211)

|                                | <u>Response option</u>              | <u>N (%)</u> |                                                     | <u>Response option</u>                          | <u>N (%)</u> |
|--------------------------------|-------------------------------------|--------------|-----------------------------------------------------|-------------------------------------------------|--------------|
| <b>Recruitment</b>             | Health care (via GP practice)       | 917 (76%)    | <b>Employment</b>                                   | Retired from work                               | 554 (46%)    |
|                                | Social care (via Local Authority)   | 294 (24%)    |                                                     | Permanently sick or disabled                    | 218 (18%)    |
| <b>Age</b>                     | 18-49 years                         | 162 (13%)    | Employed / full-time education                      | 211 (17%)                                       |              |
|                                | 50-64 years                         | 277 (23%)    | Doing something else (e.g. volunteering)            | 85 (7%)                                         |              |
|                                | 65-74 years                         | 331 (27%)    | Unemployed                                          | 31 (3%)                                         |              |
|                                | 75-84 years                         | 259 (21%)    | <i>(missing)</i>                                    | 112 (9%)                                        |              |
|                                | 85+ years                           | 128 (11%)    | <b>Marital status</b>                               | Married / civil partnership                     | 648 (54%)    |
| <i>(missing)</i>               | 54 (5%)                             | Widowed      |                                                     | 224 (19%)                                       |              |
| <b>Gender</b>                  | Female                              | 656 (54%)    |                                                     | Divorced / separated                            | 168 (14%)    |
|                                | Male                                | 528 (44%)    |                                                     | Single / never married                          | 144 (12%)    |
|                                | <i>(missing)</i>                    | 27 (2%)      | <i>(missing)</i>                                    | 27 (2%)                                         |              |
| <b>Condition*<br/>reported</b> | Depression / anxiety                | 508 (42%)    | <b>Ethnicity</b>                                    | White British                                   | 1097 (91%)   |
|                                | Chronic back pain                   | 450 (37%)    |                                                     | Other White (e.g. Irish, European)              | 38 (3%)      |
|                                | Diabetes                            | 313 (26%)    |                                                     | Black / Black British (e.g. African, Caribbean) | 18 (2%)      |
|                                | Osteoarthritis                      | 308 (25%)    |                                                     | Asian / Asian British (e.g. Indian, Pakistani)  | 17 (1%)      |
|                                | Colon problems (e.g. IBS)           | 290 (24%)    |                                                     | Mixed                                           | 8 (0.6%)     |
|                                | Heart disease                       | 284 (24%)    |                                                     | <i>(missing)</i>                                | 33 (3%)      |
|                                | COPD                                | 188 (16%)    | <b>Help needed<br/>completing<br/>questionnaire</b> | No help                                         | 896 (74%)    |
|                                | Stroke                              | 185 (15%)    |                                                     | Had help, but answers are my own                | 227 (19%)    |
|                                | Cancer within the last 5 years      | 166 (14%)    |                                                     | Someone answered for me (proxy)                 | 74 (6%)      |
|                                | Bipolar / psychosis / schizophrenia | 88 (7%)      |                                                     | <i>(missing)</i>                                | 14 (1%)      |
| Multiple Sclerosis             | 75 (6%)                             |              |                                                     |                                                 |              |

\*Percentages for Condition reported exceed 100% because most participants reported multiple conditions.

Table 2. LTCQ item responses (N = 1,211)

| Item                                                       | Never | Rarely | Sometimes | Often | Always | Missing | Not applicable** |
|------------------------------------------------------------|-------|--------|-----------|-------|--------|---------|------------------|
| 1. Able to cope well with health conditions                | 3%    | 10%    | 29%       | 26%   | 31%    | 1.5%    |                  |
| 2. Able to fulfil responsibilities                         | 12%   | 15%    | 20%       | 18%   | 32%    | 1.9%    |                  |
| 3. Able to be as physically active as you wanted           | 21%   | 20%    | 21%       | 17%   | 20%    | 1.2%    |                  |
| 4. Felt in control of daily life                           | 8%    | 13%    | 22%       | 21%   | 35%    | 1.3%    |                  |
| 5. Able to take part in activities you enjoy               | 16%   | 22%    | 22%       | 17%   | 21%    | 1.4%    |                  |
| 6. Felt that your home is suitable for your needs          | 4%    | 5%     | 15%       | 18%   | 56%    | 1.5%    |                  |
| 7. Felt safe at home                                       | 2%    | 4%     | 10%       | 19%   | 64%    | 1.2%    |                  |
| 8. Felt safe outside the home                              | 9%    | 10%    | 23%       | 18%   | 38%    | 2.0%    |                  |
| 9. Felt bothered by symptoms*                              | 9%    | 12%    | 33%       | 26%   | 19%    | 1.5%    |                  |
| 10. Felt more dependent on others than you wanted*         | 19%   | 13%    | 20%       | 21%   | 27%    | 1.0%    |                  |
| 11. Felt lonely due to health conditions*                  | 34%   | 15%    | 24%       | 15%   | 11%    | 1.0%    |                  |
| 12. Worried about being treated differently*               | 39%   | 17%    | 25%       | 10%   | 7%     | 1.5%    |                  |
| 13. Found health/other services difficult to cope with*    | 20%   | 13%    | 19%       | 6%    | 3%     | 2.2%    | 36%              |
| 14. Found treatments difficult to cope with*               | 31%   | 21%    | 19%       | 8%    | 4%     | 1.4%    | 17%              |
| 15. Felt that your health conditions made you unhappy*     | 20%   | 16%    | 31%       | 18%   | 13%    | 1.3%    |                  |
| 16. Felt you knew enough about your health conditions      | 5%    | 11%    | 24%       | 26%   | 32%    | 2.1%    |                  |
| 17. Had enough social contact with people                  | 5%    | 13%    | 21%       | 21%   | 38%    | 2.1%    |                  |
| 18. Had enough support to cope well with health conditions | 4%    | 9%     | 21%       | 25%   | 40%    | 1.4%    |                  |
| 19. Felt confident in managing health conditions           | 6%    | 8%     | 23%       | 22%   | 40%    | 1.2%    |                  |
| 20. Able to live your life as you want                     | 16%   | 17%    | 20%       | 18%   | 28%    | 1.0%    |                  |

\* Questions 9-15 are reverse-scored, i.e. 'Never' is the most positive response option

\*\*Questions 13 and 14 have an additional response option: 'have not received any health-related services / treatments in the past four weeks'. For analysis these responses were coded as 'Never'.

Table 3a. Comparison of LTCQ scores among sub-samples (main survey)

**LTCQ - main survey**

|                              |                                               | <u>N</u>    | <u>Mean</u> | <u>SD</u>   | <u>SE</u>   | <u>95% CI</u>      | <u>α</u>    | <u>ANOVA</u>                      |
|------------------------------|-----------------------------------------------|-------------|-------------|-------------|-------------|--------------------|-------------|-----------------------------------|
|                              | <b>Total sample</b>                           | <b>1082</b> | <b>65.1</b> | <b>23.0</b> | <b>0.70</b> | <b>63.7 - 66.5</b> | <b>0.95</b> |                                   |
| <b>cohort</b>                | Health care sample                            | 838         | 70.0        | 21.7        | 0.75        | 68.6 - 71.5        | 0.95        | F (1, 1080) = 201.8,<br>P < 0.001 |
|                              | Social care sample                            | 244         | 48.2        | 19.1        | 1.22        | 45.8 - 50.8        | 0.92        |                                   |
| <b>gender</b>                | male                                          | 482         | 68.5        | 22.6        | 1.03        | 66.4 - 70.5        | 0.96        | F (1, 1057) = 19.8,<br>p < 0.001  |
|                              | female                                        | 577         | 62.2        | 23.0        | 0.96        | 60.3 - 64.1        | 0.95        |                                   |
| <b>age<sup>a</sup></b>       | 18-64 years                                   | 413         | 59.7        | 23.3        | 1.15        | 57.5 - 62.0        | 0.95        | F (2, 1032) = 27.4,<br>p < 0.001  |
|                              | 65-84 years                                   | 525         | 70.2        | 21.7        | 0.95        | 68.3 - 72.0        | 0.95        |                                   |
|                              | 85+ years                                     | 97          | 60.2        | 22.6        | 2.30        | 55.7 - 64.8        | 0.95        |                                   |
| <b>morbidity<sup>b</sup></b> | 1 LTC                                         | 60          | 76.5        | 21.3        | 2.74        | 71.0 - 82.0        | 0.94        | F (3, 1057) = 75.3,<br>p < 0.001  |
|                              | 2-4 LTCs                                      | 320         | 73.9        | 21.3        | 1.19        | 71.5 - 76.2        | 0.95        |                                   |
|                              | 5-7 LTCs                                      | 351         | 67.9        | 21.5        | 1.15        | 65.7 - 70.2        | 0.95        |                                   |
|                              | 8+ LTCs                                       | 330         | 51.1        | 20.1        | 1.11        | 49.0 - 53.3        | 0.93        |                                   |
| <b>mental health</b>         | no mental health condition reported           | 624         | 74.2        | 20.2        | 0.81        | 72.6 - 75.8        | 0.94        | F (1, 1080) = 291.2,<br>P < 0.001 |
|                              | at least one mental health condition reported | 458         | 52.7        | 20.8        | 0.97        | 50.8 - 54.6        | 0.94        |                                   |

N = sample size Mean = mean LTCQ score for sub-sample SD = standard deviation SE = standard error of the mean 95% CI = 95% confidence interval

α = Cronbach's alpha (internal consistency) for 20 LTCQ items among sub-group ANOVA = one-way between-groups analysis of variance of LTCQ scores

a. Post-hoc analysis (Tukey HSD) indicated that LTCQ scores were significantly higher for the 65-84 years age group compared to both other age groups (p < 0.001).

b. Post-hoc analysis (Tukey HSD) indicated that LTCQ scores were significantly lower for those with 5-7 LTCs compared to those with one LTC (p < 0.05) and compared to those with 2-4 LTCs (p < 0.01). LTCQ scores were significantly lower for those with 8+ LTCs compared to all other groups (p < 0.001).

Table 3b. Comparison of LTCQ scores among sub-samples (follow-up survey)

LTCQ - follow-up survey

|                              |                                               | <u>N</u>   | <u>Mean</u> | <u>SD</u>   | <u>SE</u>   | <u>95% CI</u>      | <u>α</u>    | <u>ANOVA</u>                     |
|------------------------------|-----------------------------------------------|------------|-------------|-------------|-------------|--------------------|-------------|----------------------------------|
|                              | <b>Total sample</b>                           | <b>492</b> | <b>65.5</b> | <b>23.4</b> | <b>1.05</b> | <b>63.4 - 67.5</b> | <b>0.96</b> |                                  |
| <b>cohort</b>                | Health care sample                            | 379        | 70.3        | 22.3        | 1.15        | 68.0 - 72.6        | 0.96        | F (1, 490) = 82.4,<br>p < 0.001  |
|                              | Social care sample                            | 113        | 49.2        | 19.3        | 1.82        | 45.6 - 52.8        | 0.92        |                                  |
| <b>gender</b>                | male                                          | 229        | 68.7        | 22.8        | 1.5         | 65.8 - 71.7        | 0.96        | F (1, 480) = 8.0,<br>p < 0.01    |
|                              | female                                        | 253        | 62.8        | 23.4        | 1.47        | 59.9 - 65.7        | 0.96        |                                  |
| <b>age<sup>a</sup></b>       | 18-64 years                                   | 184        | 58.8        | 23.8        | 1.76        | 55.3 - 62.3        | 0.96        | F (2, 469) = 14.4,<br>p < 0.001  |
|                              | 65-84 years                                   | 250        | 70.6        | 22.1        | 1.39        | 67.9 - 73.4        | 0.96        |                                  |
|                              | 85+ years                                     | 38         | 65.6        | 20.7        | 3.35        | 58.8 - 72.4        | 0.94        |                                  |
| <b>morbidity<sup>b</sup></b> | 1 LTC                                         | 22         | 78.2        | 18.3        | 3.89        | 70.1 - 86.3        | 0.93        | F (3, 482) = 43.9,<br>p < 0.001  |
|                              | 2-4 LTCs                                      | 157        | 76.2        | 19.9        | 1.59        | 73.1 - 79.4        | 0.95        |                                  |
|                              | 5-7 LTCs                                      | 143        | 67.7        | 23.6        | 1.97        | 63.8 - 71.6        | 0.97        |                                  |
|                              | 8+ LTCs                                       | 164        | 50.9        | 19.4        | 1.51        | 47.9 - 53.9        | 0.93        |                                  |
| <b>mental health</b>         | no mental health condition reported           | 290        | 74.6        | 20.1        | 1.18        | 72.4 - 77.1        | 0.95        | F (1, 490) = 144.2,<br>p < 0.001 |
|                              | at least one mental health condition reported | 202        | 52.1        | 21.3        | 1.5         | 49.1 - 55.0        | 0.95        |                                  |

N = sample size Mean = mean LTCQ score for sub-sample SD = standard deviation SE = standard error of the mean 95% CI = 95% confidence interval  
α = Cronbach's alpha (internal consistency) for 20 LTCQ items among sub-group ANOVA = one-way between-groups analysis of variance of LTCQ scores

- a. Post-hoc analysis (Tukey HSD) indicated that LTCQ scores were significantly higher for the 65-84 years age group compared to the 18-64 years age group (p < 0.001).
- b. Post-hoc analysis (Tukey HSD) indicated that LTCQ scores were significantly lower for those with 5-7 LTCs compared to those with 2-4 LTCs (p < 0.01). LTCQ scores were significantly lower for those with 8+ LTCs compared to all other groups (p < 0.001).

Table 4. Construct validity

| Measure                     | Mean score (SD, SE, 95% CI)    | Score range | Interpretation of higher score                  | Correlation with LTCQ score (Spearman's rho) |
|-----------------------------|--------------------------------|-------------|-------------------------------------------------|----------------------------------------------|
| LTCQ                        | 65.1 (23.0, 0.70, 63.7 – 66.5) | 0 to 100    | living better with long-term conditions         | -                                            |
| EQ-5D-5L                    | 0.62 (0.33, 0.01, 0.60 – 0.63) | -0.28 to 1  | better health-related quality of life           | 0.82***                                      |
| EQ-VAS                      | 62.4 (24.6, 0.72, 61.0 – 63.8) | 0 to 100    | better health-related quality of life           | 0.79***                                      |
| Self-efficacy scale         | 6.2 (2.7, 0.08, 6.1 – 6.4)     | 1 to 10     | greater confidence for managing chronic disease | 0.87***                                      |
| Activities of Daily Living  | 5.0 (4.8, 0.14, 4.7 – 5.3)     | 0 to 13     | more problems with activities of daily living   | - 0.79***                                    |
| Bayliss burden of morbidity | 16.4 (13.1, 0.38, 15.7 – 17.2) | 0 to 150    | more limits on daily activities from LTCs       | -0.64***                                     |

\*\*\*Correlation is significant at  $p < 0.001$  (2-tailed).

SD = standard deviation SE = standard error of the mean 95% CI = 95% confidence interval

Figure 1. Comparison of LTCQ score distributions: health versus social care; mental versus physical health condition(s)

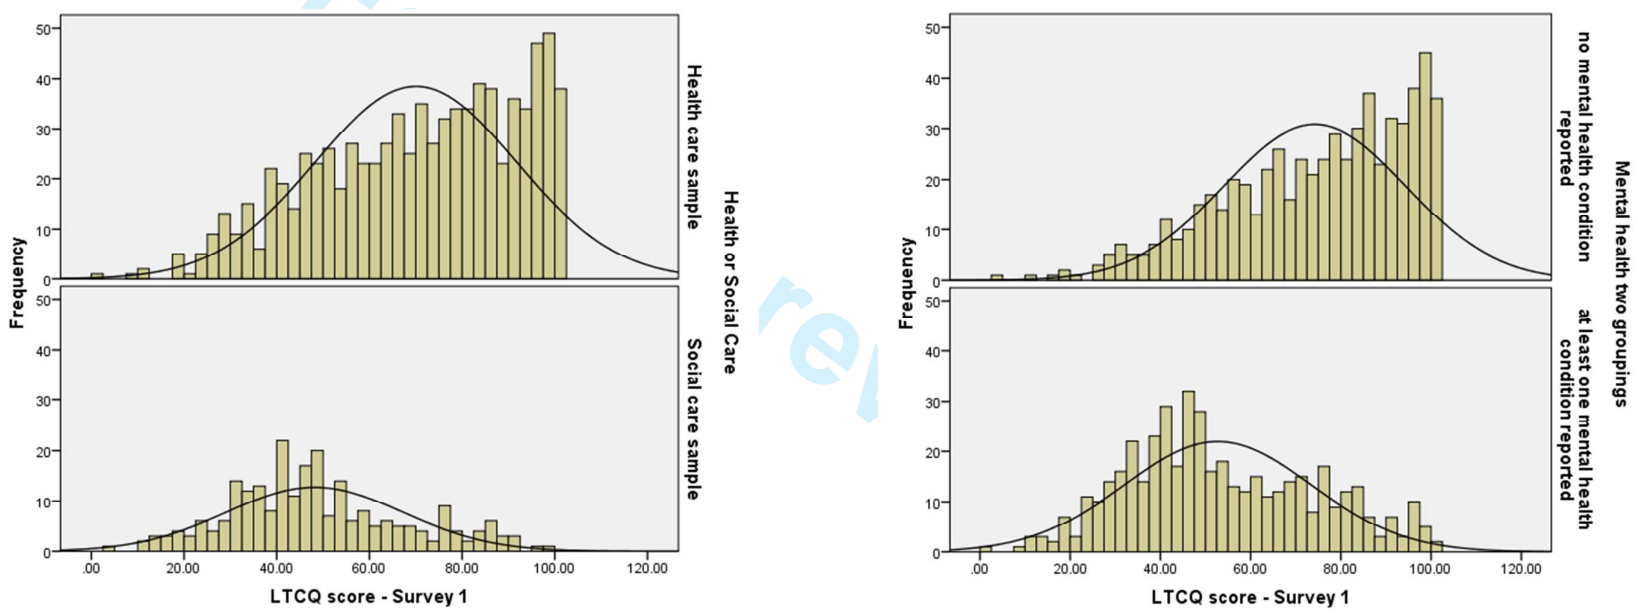

1  
2  
3  
4  
5  
6  
7  
8  
9  
10  
11  
12  
13  
14  
15  
16  
17  
18  
19  
20  
21  
22  
23  
24  
25  
26  
27  
28  
29  
30  
31  
32  
33  
34  
35  
36  
37  
38  
39  
40  
41  
42  
43  
44  
45  
46  
47  
48  
49

STROBE Statement—Checklist of items that should be included in reports of *cross-sectional studies*

|                           | Item No | Recommendation                                                                                                                                                                       | Location in paper                                                |
|---------------------------|---------|--------------------------------------------------------------------------------------------------------------------------------------------------------------------------------------|------------------------------------------------------------------|
| <b>Title and abstract</b> | 1       | (a) Indicate the study's design with a commonly used term in the title or the abstract                                                                                               | Title – p.1<br>Abstract – p.2                                    |
|                           |         | (b) Provide in the abstract an informative and balanced summary of what was done and what was found                                                                                  | Abstract – p.2                                                   |
| <b>Introduction</b>       |         |                                                                                                                                                                                      |                                                                  |
| Background/rationale      | 2       | Explain the scientific background and rationale for the investigation being reported                                                                                                 | p.3                                                              |
| Objectives                | 3       | State specific objectives, including any prespecified hypotheses                                                                                                                     | p.3                                                              |
| <b>Methods</b>            |         |                                                                                                                                                                                      |                                                                  |
| Study design              | 4       | Present key elements of study design early in the paper                                                                                                                              | Abstract – p.2,<br>Methods – p.4                                 |
| Setting                   | 5       | Describe the setting, locations, and relevant dates, including periods of recruitment, exposure, follow-up, and data collection                                                      | Methods – p.4-5                                                  |
| Participants              | 6       | (a) Give the eligibility criteria, and the sources and methods of selection of participants                                                                                          | Methods (Participant recruitment) – p.4-5                        |
| Variables                 | 7       | Clearly define all outcomes, exposures, predictors, potential confounders, and effect modifiers. Give diagnostic criteria, if applicable                                             | Methods (The Surveys) – p.5                                      |
| Data sources/ measurement | 8*      | For each variable of interest, give sources of data and details of methods of assessment (measurement). Describe comparability of assessment methods if there is more than one group | Methods (Analysis) – p.5-6                                       |
| Bias                      | 9       | Describe any efforts to address potential sources of bias                                                                                                                            | Methods (Participant recruitment) – p.4-5                        |
| Study size                | 10      | Explain how the study size was arrived at                                                                                                                                            | Methods – p.4                                                    |
| Quantitative variables    | 11      | Explain how quantitative variables were handled in the analyses. If applicable, describe which groupings were chosen and why                                                         | Methods (Analysis) – p.5-6                                       |
| Statistical methods       | 12      | (a) Describe all statistical methods, including those used to control for confounding                                                                                                | Methods (Analysis) – p.5-6                                       |
|                           |         | (b) Describe any methods used to examine subgroups and interactions                                                                                                                  | Methods (Analysis) – p.6, Results (Sub-sample comparisons) – p.9 |
|                           |         | (c) Explain how missing data were addressed                                                                                                                                          | Methods (Analysis) – p.6                                         |
|                           |         | (d) If applicable, describe analytical methods taking account of sampling strategy                                                                                                   | N/A                                                              |
|                           |         | (e) Describe any sensitivity analyses                                                                                                                                                | N/A                                                              |
| <b>Results</b>            |         |                                                                                                                                                                                      |                                                                  |
| Participants              | 13*     | (a) Report numbers of individuals at each stage of                                                                                                                                   | Methods (Participant                                             |



|                          |     |                                                                                                                                                                                                              |                                                                                                                                         |
|--------------------------|-----|--------------------------------------------------------------------------------------------------------------------------------------------------------------------------------------------------------------|-----------------------------------------------------------------------------------------------------------------------------------------|
|                          |     | study—eg numbers potentially eligible, examined for eligibility, confirmed eligible, included in the study, completing follow-up, and analysed                                                               | recruitment) – p.4-5 ,<br>Results (Sample characteristics, Test-retest reliability) – p.7, p.8-9                                        |
|                          |     | (b) Give reasons for non-participation at each stage                                                                                                                                                         | Cannot comment as no contact with non-responders                                                                                        |
|                          |     | (c) Consider use of a flow diagram                                                                                                                                                                           | N/A                                                                                                                                     |
| Descriptive data         | 14* | (a) Give characteristics of study participants (eg demographic, clinical, social) and information on exposures and potential confounders                                                                     | Results (Sample characteristics) – p.7<br>Table 1 – p.15                                                                                |
|                          |     | (b) Indicate number of participants with missing data for each variable of interest                                                                                                                          | Table 2 – p.16                                                                                                                          |
| Outcome data             | 15* | Report numbers of outcome events or summary measures                                                                                                                                                         | Table 3 – p.17-18,<br>Table 4 – p.19,<br>Figure 1 – p.20                                                                                |
| Main results             | 16  | (a) Give unadjusted estimates and, if applicable, confounder-adjusted estimates and their precision (eg, 95% confidence interval). Make clear which confounders were adjusted for and why they were included | N/A as regression not performed for a survey validation study.                                                                          |
|                          |     | (b) Report category boundaries when continuous variables were categorized                                                                                                                                    | N/A                                                                                                                                     |
|                          |     | (c) If relevant, consider translating estimates of relative risk into absolute risk for a meaningful time period                                                                                             | N/A                                                                                                                                     |
| Other analyses           | 17  | Report other analyses done—eg analyses of subgroups and interactions, and sensitivity analyses                                                                                                               | Results (factor analysis, internal consistency, test-retest reliability, sub-sample comparisons, convergent construct validity) – p.7-9 |
| <b>Discussion</b>        |     |                                                                                                                                                                                                              |                                                                                                                                         |
| Key results              | 18  | Summarise key results with reference to study objectives                                                                                                                                                     | Discussion – p.9-10<br>(paragraph 1)                                                                                                    |
| Limitations              | 19  | Discuss limitations of the study, taking into account sources of potential bias or imprecision. Discuss both direction and magnitude of any potential bias                                                   | Discussion – p.10<br>(paragraph 3)                                                                                                      |
| Interpretation           | 20  | Give a cautious overall interpretation of results considering objectives, limitations, multiplicity of analyses, results from similar studies, and other relevant evidence                                   | Discussion – p.10-11<br>(paragraphs 4-5)                                                                                                |
| Generalisability         | 21  | Discuss the generalisability (external validity) of the study results                                                                                                                                        | Discussion – p.10-11<br>(paragraph 5)                                                                                                   |
| <b>Other information</b> |     |                                                                                                                                                                                                              |                                                                                                                                         |
| Funding                  | 22  | Give the source of funding and the role of the funders for the present study and, if applicable, for the original study                                                                                      | Funding – p.11                                                                                                                          |

---

on which the present article is based

---

\*Give information separately for exposed and unexposed groups.

**Note:** An Explanation and Elaboration article discusses each checklist item and gives methodological background and published examples of transparent reporting. The STROBE checklist is best used in conjunction with this article (freely available on the Web sites of PLoS Medicine at <http://www.plosmedicine.org/>, Annals of Internal Medicine at <http://www.annals.org/>, and Epidemiology at <http://www.epidem.com/>). Information on the STROBE Initiative is available at [www.strobe-statement.org](http://www.strobe-statement.org).

For peer review only

# BMJ Open

## The Long-Term Conditions Questionnaire (LTCQ): initial validation survey among primary care patients and social care recipients in England

|                                 |                                                                                                                                                                                                                                                                                                                                                                                                                                                                                                                                                                                                                                                                                                                                                                                                                                                                                                                                                                                                                                                                                                                                                                                                                                                                                                                                                                                                                                                                                                                                                                                                                    |
|---------------------------------|--------------------------------------------------------------------------------------------------------------------------------------------------------------------------------------------------------------------------------------------------------------------------------------------------------------------------------------------------------------------------------------------------------------------------------------------------------------------------------------------------------------------------------------------------------------------------------------------------------------------------------------------------------------------------------------------------------------------------------------------------------------------------------------------------------------------------------------------------------------------------------------------------------------------------------------------------------------------------------------------------------------------------------------------------------------------------------------------------------------------------------------------------------------------------------------------------------------------------------------------------------------------------------------------------------------------------------------------------------------------------------------------------------------------------------------------------------------------------------------------------------------------------------------------------------------------------------------------------------------------|
| Journal:                        | <i>BMJ Open</i>                                                                                                                                                                                                                                                                                                                                                                                                                                                                                                                                                                                                                                                                                                                                                                                                                                                                                                                                                                                                                                                                                                                                                                                                                                                                                                                                                                                                                                                                                                                                                                                                    |
| Manuscript ID                   | bmjopen-2017-019235.R1                                                                                                                                                                                                                                                                                                                                                                                                                                                                                                                                                                                                                                                                                                                                                                                                                                                                                                                                                                                                                                                                                                                                                                                                                                                                                                                                                                                                                                                                                                                                                                                             |
| Article Type:                   | Research                                                                                                                                                                                                                                                                                                                                                                                                                                                                                                                                                                                                                                                                                                                                                                                                                                                                                                                                                                                                                                                                                                                                                                                                                                                                                                                                                                                                                                                                                                                                                                                                           |
| Date Submitted by the Author:   | 25-Sep-2017                                                                                                                                                                                                                                                                                                                                                                                                                                                                                                                                                                                                                                                                                                                                                                                                                                                                                                                                                                                                                                                                                                                                                                                                                                                                                                                                                                                                                                                                                                                                                                                                        |
| Complete List of Authors:       | <p>Potter, Caroline; University of Oxford, Health Services Research Unit, Nuffield Department of Population Health</p> <p>Batchelder, Laurie; University of Kent Personal Social Services Research Unit,</p> <p>A'Court, Christine; University of Oxford, Nuffield Department of Primary Care Health Sciences</p> <p>Geneen, Louise; University of Oxford, Health Services Research Unit, Nuffield Department of Population Health</p> <p>Kelly, Laura; University of Oxford, Health Services Research Unit, Nuffield Department of Population Health</p> <p>Fox, Diane; University of Kent Personal Social Services Research Unit</p> <p>Baker, Matthew ; Quality and Outcomes of Person-Centred Care Policy Research Unit</p> <p>Bostock, Jennifer; Quality and Outcomes of Person-Centred Care Policy Research Unit</p> <p>Coulter, Angela; University of Oxford, Health Services Research Unit, Nuffield Department of Population Health</p> <p>Fitzpatrick, Ray; University of Oxford, Health Services Research Unit, Nuffield Department of Population Health</p> <p>Forder, Julien; University of Kent, PSSRU; London School of Economics, PSSRU</p> <p>Gibbons, Elizabeth; University of Oxford, Health Services Research Unit, Nuffield Department of Population Health</p> <p>Jenkinson, Crispin; University of Oxford, Health Services Research Unit, Nuffield Department of Population Health</p> <p>Jones, Karen; University of Kent Personal Social Services Research Unit</p> <p>Peters, Michele; University of Oxford, Health Services Research Unit, Nuffield Department of Population Health</p> |
| <b>Primary Subject Heading</b>: | Patient-centred medicine                                                                                                                                                                                                                                                                                                                                                                                                                                                                                                                                                                                                                                                                                                                                                                                                                                                                                                                                                                                                                                                                                                                                                                                                                                                                                                                                                                                                                                                                                                                                                                                           |
| Secondary Subject Heading:      | Health services research                                                                                                                                                                                                                                                                                                                                                                                                                                                                                                                                                                                                                                                                                                                                                                                                                                                                                                                                                                                                                                                                                                                                                                                                                                                                                                                                                                                                                                                                                                                                                                                           |
| Keywords:                       | long-term conditions, chronic illness, patient-reported outcome measure, multi-morbidity, person-centred care                                                                                                                                                                                                                                                                                                                                                                                                                                                                                                                                                                                                                                                                                                                                                                                                                                                                                                                                                                                                                                                                                                                                                                                                                                                                                                                                                                                                                                                                                                      |
|                                 |                                                                                                                                                                                                                                                                                                                                                                                                                                                                                                                                                                                                                                                                                                                                                                                                                                                                                                                                                                                                                                                                                                                                                                                                                                                                                                                                                                                                                                                                                                                                                                                                                    |

1  
2  
3  
4  
5  
6  
7  
8  
9  
10  
11  
12  
13  
14  
15  
16  
17  
18  
19  
20  
21  
22  
23  
24  
25  
26  
27  
28  
29  
30  
31  
32  
33  
34  
35  
36  
37  
38  
39  
40  
41  
42  
43  
44  
45  
46  
47  
48  
49  
50  
51  
52  
53  
54  
55  
56  
57  
58  
59  
60

SCHOLARONE™  
Manuscripts

For peer review only

1  
2  
3 **The Long-Term Conditions Questionnaire (LTCQ): initial validation survey among primary**  
4 **care patients and social care recipients in England**  
5  
6  
7

8 Caroline M Potter<sup>1,5</sup>, Laurie Batchelder<sup>2,4</sup>, Christine A'Court<sup>3</sup>, Louise Geneen<sup>1,4</sup>, Laura Kelly<sup>1,5</sup>, Diane  
9 Fox<sup>2,4</sup>, Matthew Baker<sup>4</sup>, Jennifer Bostock<sup>4</sup>, Angela Coulter<sup>1,4</sup>, Ray Fitzpatrick<sup>1,4,5</sup>, Julien Forder<sup>2,4</sup>,  
10 Elizabeth Gibbons<sup>1,5</sup>, Crispin Jenkinson<sup>1,4</sup>, Karen Jones<sup>2,4</sup>, Michele Peters<sup>1,4</sup>  
11  
12

13 <sup>1</sup> Health Services Research Unit, Nuffield Department of Population Health, University of Oxford, Oxford, UK

14 <sup>2</sup> Personal Social Services Research Unit, School of Social Policy Sociology and Social Research, University of  
15 Kent, Canterbury UK

16 <sup>3</sup> Nuffield Department of Primary Care Health Sciences, University of Oxford, Oxford, UK

17 <sup>4</sup> QORU: Quality and Outcomes of Person-centred Care Policy Research Unit, Department of Health England, UK

18 <sup>5</sup> NIHR Collaboration for Leadership in Applied Health Research and Care (CLAHRC) Oxford, Oxford, UK  
19  
20  
21  
22  
23

24 **Addresses and author positions:**

- 25  
26 1. Health Services Research Unit, Richard Doll Building, Old Road Campus, The University of Oxford,  
27 Roosevelt Drive, Headington, Oxford, OX3 7LF, United Kingdom.  
28

29 Caroline M Potter, Research Officer. Louise Geneen, Research Officer. Laura Kelly, Research Officer.  
30 Angela Coulter, Senior Research Scientist. Ray Fitzpatrick, Professor of Public Health and Primary  
31 Care. Elizabeth Gibbons, Senior Research Scientist. Crispin Jenkinson, Professor of Health Services  
32 Research. Michele Peters, Senior Research Scientist.  
33  
34

- 35 2. Quality and Outcomes of Person-centred Care Policy Research Unit, c/o Personal Social Services  
36 Research Unit, George Allen Wing, Cornwallis Building, University of Kent, Canterbury, Kent, CT2  
37 7NF, United Kingdom.  
38  
39

40 Laurie Batchelder, Research Officer. Diane Fox, Research Officer. Matthew Baker, Research Advisor  
41 and Public Involvement Implementation Group. Jennifer Bostock, Research Advisor and Public  
42 Involvement Implementation Group. Julien Forder, Professor of Economics of Social Policy. Karen  
43 Jones, Assistant Director of PSSRU.  
44

- 45 3. Interdisciplinary Research in Health Sciences, Nuffield Department of Primary Care Health  
46 Sciences, Radcliffe Observatory Quarter, Woodstock Road, Oxford, OX2 6GG, United Kingdom.  
47  
48

49 Christine A'Court, Clinical Researcher and GP.  
50  
51  
52

53 **Correspondence to:** Dr Caroline Potter, [caroline.potter@dph.ox.ac.uk](mailto:caroline.potter@dph.ox.ac.uk), +44 (0)1865 289393  
54

55 **Word count** (Introduction, Methods, Results, Discussion, Conclusions): 4,916  
56  
57  
58  
59  
60

## Abstract

*Objective:* The aim of this study was to validate a new generic patient-reported outcome measure, the Long-Term Conditions Questionnaire (LTCQ), among a diverse sample of health and social care users in England.

*Design:* Cross-sectional validation survey. Data were collected through postal surveys (February 2016 - January 2017). The sample included a health care cohort of patients recruited through primary care practices, and a social care cohort recruited through local government bodies that provide social care services.

*Participants:* 1,211 participants (24% confirmed social care recipients) took part in the study. Health care participants were recruited on the basis of having one of eleven specified LTCs, and social care participants were recruited on the basis of receiving social care support for at least one LTC. The sample exhibited high multi-morbidity, with 93% reporting two or more LTCs and 43% reporting a mental health condition.

*Outcome measures:* The LTCQ's construct validity was tested with reference to the EQ-5D (5-level version), the Self-efficacy for Managing Chronic Disease scale, an Activities of Daily Living scale, and the Bayliss burden of morbidity scale.

*Results:* Low levels of missing data for each item indicate acceptability of the LTCQ across the sample. The LTCQ exhibits high internal consistency (Cronbach's  $\alpha = 0.95$ ) across the scale's 20 items and excellent test-retest reliability (ICC = 0.94, 95% CI 0.93 to 0.95). Associations between the LTCQ and all reference measures were moderate to strong and in the expected directions, indicating convergent construct validity.

*Conclusions:* This study provides evidence for the reliability and validity of the Long-Term Conditions Questionnaire, which has potential for use in both health and social care settings. The LTCQ could meet a need for holistic outcome measurement that goes beyond symptoms and physical function, complementing existing measures to capture fully what it means to live well with LTCs.

**Key words:** long-term conditions, chronic illness, patient-reported outcome measure, multi-morbidity, person-centred care

### Strengths and limitations of this study

- This study is the first psychometric evaluation of the Long-Term Conditions Questionnaire, a new generic patient-reported outcome measure.
- The study included a large survey validation sample of 1,211 health and social care users in England.
- The sample was highly diverse in terms of illness burden and care needs, with 93% reporting multi-morbidity and 43% reporting a mental health condition.
- A limitation was the low response rate achieved among social care users, although this was consistent with previous studies.
- Further validation work among other ethnic groups and in non-English contexts is required since the vast majority of participants were white British.

## INTRODUCTION

Long-term chronic conditions have emerged as a significant challenge to the sustainability of health systems worldwide. Considering the high global burden of long-term conditions (LTCs), their management is a top priority in policy terms.<sup>1,2</sup> In England, around one-quarter of the population lives with at least one LTC, accounting for nearly three-quarters of the cost of health and social care services.<sup>3</sup> In particular the rise of multi-morbidity has highlighted the need for integrated services that can address a person's overall health status and enhance their capacity for living well with their conditions.

Patient-reported outcome measures (PROMs) are essential tools for capturing the impact of illness as experienced by those living with LTCs, and the potential of PROMs for facilitating person-centred care has been recognized for more than a decade.<sup>4</sup> However, there is currently no agreed patient-reported measure for evaluating the intended outcome of person-centred care, which could broadly be described as 'living well' within the overall context of one's health condition(s). 'Living well with LTCs' is a complex construct that encompasses both traditional health-related quality of life (HRQoL) domains (e.g. symptom severity, physical and social functioning, emotional well-being) and more recently recognized domains of importance (e.g. treatment burden, empowerment, confidence in self-management).<sup>5,6</sup> A comprehensive measure for assessing the impacts of LTCs should thus move beyond traditional health-status domains of PROMs to capture a more holistic notion of living well.<sup>7</sup>

While a plethora of condition-specific and generic PROMs exist, both types of measure have shortcomings for capturing what it means to live well with LTCs. In focusing on a single disease category, condition-specific PROMs cannot adequately address the phenomenon of multi-morbidity, where impacts may be cumulative or inter-dependent across all conditions.<sup>8</sup> Standardised generic PROMs such as the EQ-5D<sup>9</sup> and SF-36,<sup>10</sup> while valuable for comparative population-level analyses, are unlikely to capture all issues of importance for people living with LTCs.<sup>11,12</sup> Furthermore, these measures may not be appropriate for long-term monitoring of LTCs, where the objectives of health and social care services may be to maintain well-being and/or to avoid deterioration rather than to achieve major health gains.<sup>13</sup> A further complication arises with the distinction between health-related and social care-related measures,<sup>14</sup> as people with complex needs will potentially draw on both types of services. A measure that is appropriate for both contexts could facilitate the development of person-centred care pathways, which are increasingly recognised as preferable to disease-specific care pathways in the context of multi-morbidity.<sup>15</sup>

The aim of this study was to test and validate a new PROM, the Long-Term Conditions Questionnaire (LTCQ). The LTCQ is intended to be relevant and acceptable for people with single or multiple LTCs (physical and/or mental health conditions), and meaningful for health and social care providers in their capacities for monitoring and improving outcomes in LTCs. Additionally, the LTCQ is intended to be short, easy to interpret, and feasible for use in different clinical settings. It is intended for use both as a tool for monitoring and enhancing individual care, and as a population-level tool for measuring health and social care performance, quality and outcomes. The scope of the LTCQ goes well beyond symptoms and physical function; its content development has been described previously and involved interviews with professional stakeholders,<sup>16</sup> qualitative in-depth interviews with people living with LTCs,<sup>17</sup> and pre-testing (e.g. cognitive interviews, translatability assessment) to refine questionnaire items.<sup>18</sup>

## METHODS

This study was reviewed by England's National Research Ethics Service (NRES) Committee East Midlands – Derby (reference 15/EM/0414). Approvals for the study were granted by the Health Research Authority of England's National Health Service (NHS), and local health and social care organisations linked to participant recruitment sites. Data were collected through two postal surveys (a main survey and a follow-up survey) administered to two cohorts: a health care sample recruited through primary care practices (data collected February 2016 – July 2016), and a social care sample recruited through Local Authorities (LAs) that provide funding for social care services (data collected July 2016 – January 2017). Methods and findings presented below follow STROBE reporting guidelines for cross-sectional studies<sup>19</sup> and COSMIN criteria for reporting measurement properties of health status questionnaires.<sup>20</sup> The latter indicates a minimum sample size of 10 subjects per questionnaire item (i.e. 200 participants for this survey validation study), which exceeds the minimum of 100 subjects required for factor analysis within Classical Test Theory. Owing to the complexity of the construct being measured and the diversity of the target population, the study authors aimed to achieve a minimum sample size of 1000 participants.

### Participant recruitment

For the health care cohort, participants were recruited by fifteen General Practitioner (GP) practices from three regions of England (South East, North West, Yorkshire & Humber). In an effort to recruit a maximally diverse sample, the research team selected practices that served both rural and urban areas, and areas of high and low deprivation. For a participant to be invited into the study, the GP practice confirmed diagnosis of one of eleven specified LTCs: cancer within the last 5 years, chronic back pain, chronic obstructive pulmonary disease (COPD), diabetes, depression, irritable bowel syndrome (IBS), ischaemic heart disease (IHD), multiple sclerosis (MS), osteoarthritis (OA), severe mental health (as defined under the UK Quality and Outcomes Framework,<sup>21</sup> including psychoses, bipolar disorder and schizophrenia), and stroke. The eleven selected conditions were chosen by a panel of PROMs researchers and lay advisors, with the aim of maximising diversity in terms of symptoms, disease trajectory, prevalence, mean age of onset, likelihood of comorbidities, burden of disease, type of health and social care needed, level of self-management and burden of care. Each practice recruited from patient groups representing at least five of the eleven conditions, with some practices asked to prioritise certain conditions that were otherwise under-represented. Recruitment was restricted to those diagnosed more than 12 months previously to ensure that participants had adjusted to their diagnosis and had experienced a range of services and strategies for the management of their LTC(s). Only adults (i.e. 18 years of age and above) able to consent who were able to communicate in English were included, with no upper age limit. A total of 2,983 eligible patients were invited to participate for the health care cohort (approximately 200 study packs mailed out by each participating GP practice).

For the social care cohort, participants were recruited by four Local Authorities of different types (unitary, metropolitan, county and London borough) in geographically diverse regions (North West, East of England, South West and Greater London) representing a mix of urban and rural communities. Individuals were eligible for the study if they received fully or partially funded long-term social care support, provided that the primary reason for support was a physical disability, sensory impairment, or a mental health condition as listed in table LTS001b on the Short and Long



1  
2  
3 Term (SALT) mandatory data returns for social care.<sup>22</sup> Potential participants were eligible if they  
4 received community-based services, were at least 18 years old, and were able to communicate in  
5 English. Individuals who received nursing or residential care, whose primary reason of support was a  
6 learning disability or cognitive impairment (as listed on Table LTS001b of SALT), or whose records  
7 indicated that they lacked mental capacity to consent to research were excluded. The research team  
8 provided each Local Authority with study packs, which were mailed directly by the LAs to 2,294  
9 eligible participants. This was to ensure that no personal data of individuals were disclosed to the  
10 research team without consent.  
11  
12

### 13 **The surveys**

14  
15 The study packs contained an invitation letter from the GP / LA, a participant information sheet, and  
16 the main survey (Survey 1). Survey 1 included the Long-Term Conditions Questionnaire (LTCQ) and  
17 other measures for testing the LTCQ's construct validity: EQ-5D (5-level version including the EQ-  
18 VAS),<sup>23</sup> the Self-efficacy for Managing Chronic Disease 6-item scale,<sup>24</sup> an Activities of Daily Living  
19 scale,<sup>25</sup> and the Bayliss burden of morbidity scale (adapted with permission from the developers to  
20 include all conditions for which participants in this study had been recruited).<sup>26</sup> These were selected  
21 because they measure different domains that were hypothesized to underpin the LTCQ's broad  
22 construct of 'living well with LTCs': physical functioning, symptom burden and emotional well-being  
23 (EQ-5D); confidence to self-manage (Self-efficacy scale), functioning and independence (ADLs),  
24 cumulative impact of LTCs (Bayliss scale). Survey 1 also included demographic questions, questions  
25 on service use, a question about help needed to complete the questionnaire, and a box for free-text  
26 comments. Additionally for the social care cohort, Survey 1 included a measure of social care-related  
27 quality of life, the Adult Social Care Outcomes Toolkit (ASCOT),<sup>27</sup> but this measure is not included in  
28 the initial validation analysis for the total sample. A pre-paid, addressed return envelope was  
29 provided in all study packs. After approximately two weeks participants were sent a thank you /  
30 reminder letter from the GP / LA in order to encourage further responses.  
31  
32  
33  
34  
35  
36

37 Survey 1 contained an address slip through which respondents could express willingness to receive  
38 the follow-up survey (Survey 2). Among those who provided contact details (n = 980, 81%), a sub-  
39 sample of 693 respondents (57%) were sent Survey 2 approximately two weeks after returning  
40 Survey 1. The sub-sample included 54% of the health care cohort (n = 499) and 66% of the social care  
41 cohort (n = 194). Survey 2 contained only the LTCQ, a reduced number of demographics questions,  
42 and a health transition question asking about changes in health status during the period between  
43 completing Survey 1 and Survey 2. A pre-paid, addressed return envelope was provided with all  
44 questionnaires. Participants who had not returned Survey 2 within approximately two weeks were  
45 sent a reminder letter.  
46  
47  
48

### 49 **Analysis**

50  
51 All data were entered into SPSS (version 24), a statistical software package. A coding framework was  
52 specified in advance and used by all research team members for consistency in data entry. Data  
53 cleaning was undertaken via analysis of frequencies for all items in Survey 1, with any anomalies  
54 checked against the original questionnaires and corrected as necessary. Particular attention was  
55 given to the 20 items of the LTCQ, for which any missing or multiple responses prompted visual  
56 inspection and verification/correction of data for the entire Survey 1 questionnaire. The same  
57  
58  
59  
60

1  
2  
3 procedure for data entry, checking and cleaning was followed for Survey 2 among the health cohort,  
4 and for both Survey 1 and Survey 2 among the social care cohort, to ensure data quality across the  
5 full dataset.  
6

7  
8 Exploratory factor analysis of the 20 LTCQ items was undertaken (see Results), from which it was  
9 concluded that the LTCQ could be scored as a single composite measure. The appropriateness of  
10 scoring items as a single scale was further evaluated through examination of inter-item correlations  
11 (acceptable if 0.8 or less) and item-total correlations (acceptable if 0.3 or more).<sup>28</sup> LTCQ items were  
12 scored on a scale from 0 (most negative response) to 4 (most positive response). Items 9-15 are  
13 negatively phrased and were therefore reverse-scored. Taking a conservative approach and  
14 following best practice guidelines,<sup>29</sup> only responses for which all 20 LTCQ items had been answered  
15 were included in the initial validation analysis. A sum of the 20 item scores was calculated and  
16 recalibrated to give an overall LTCQ score ranging from 0 to 100, with higher scores indicating a  
17 better level of 'living well with LTCs'. Cronbach's alpha ( $\alpha$ ) was calculated as a measure of internal  
18 consistency of the scale. Test-retest reliability was assessed via calculation of the Intraclass  
19 Correlation Coefficient (ICC) type 2 (two-way random effects, absolute agreement) among  
20 respondents who reported no change in health status between Survey 1 and Survey 2. ANOVA was  
21 employed to compare LTCQ scores among sub-groups within the sample (i.e. by gender, age, health  
22 versus social care cohort, mental versus physical health conditions, number of conditions reported).  
23 Owing to the clustered study design (i.e. participants recruited through selected GP practices and  
24 Local Authorities), Intra-Cluster Correlation Coefficients (ICCs)<sup>30</sup> were calculated for each item to  
25 assess the extent to which variance in responses was associated with recruitment site.  
26  
27  
28  
29  
30  
31

32 Scores for all existing measures were calculated according to developers' instructions. For the EQ-  
33 5D-5L, value sets recently reported for a population in England were used to calculate a single index  
34 value for each participant's reported health state,<sup>31</sup> scores are only calculated if all five items have  
35 been completed, with a theoretical range of -0.28 (a state worse than death) to 1 (best possible  
36 health state). The EQ-VAS score, a measure of overall health on that day, ranges from 0 (the worst  
37 health you can imagine) to 100 (the best health you can imagine). For the Self-efficacy measure, six  
38 items asked about confidence in doing certain health-related activities on a scale from 1 (not at all  
39 confident) to 10 (totally confident); the overall score is calculated as the mean of item scores,  
40 provided that participants had completed at least four of the six items. The ADL score is calculated as  
41 the sum of all items for which difficulty in managing daily activities was reported, ranging from 0 (no  
42 difficulty with any listed activities) to 13 (at least some difficulty with all listed activities). The Bayliss  
43 burden of morbidity measure lists 25 LTCs and asks respondents to indicate the impact of each  
44 condition on their lives; a score of 0 indicates that the respondent does not have that condition,  
45 while scores for individual items ranging from 1 (has the condition but it does not limit daily  
46 activities at all) to 5 (has the condition and it limits daily activities a lot) indicates the impact of any  
47 reported condition. The total morbidity score was calculated as the sum of impact scores for all  
48 conditions reported, including up to three LTCs that respondents could list as 'other long-term  
49 conditions not mentioned above'. A count function was applied to the morbidity measure to  
50 calculate the number and type (physical or mental health) of LTCs reported by each respondent. For  
51 assessment of construct validity, correlations (Spearman's rho) were calculated for the LTCQ score in  
52 relation to all other measures.  
53  
54  
55  
56  
57  
58  
59  
60

## RESULTS

### Sample characteristics

A total of 917 participants were recruited through primary care (31% response rate), and 294 participants were recruited through social care (13% response rate), giving a total sample of 1,211 participants (23% overall response rate). Demographic information is shown in Table 1. The age range was 18 to 102 years, with a mean age of 67 (SD 15.3 years). Fifty-four percent (n = 656) were female, just over half were married or in a civil partnership (n = 648, 54%), and just under half were fully retired from work (n = 554, 46%). The sample was mainly white British (n = 1,097, 91%), with limited representation from non-white groups. Although participants were recruited on the basis of having one LTC, the sample exhibited a high degree of multi-morbidity; 1,124 participants (93%) reported having two or more conditions, with a mean of 6.2 LTCs (SD 3.8 LTCs) reported across the sample. 522 participants (43%) reported at least one mental health condition, with the majority of these also reporting at least one physical LTC.

### Acceptability

The LTCQ was completed in full by 1,082 participants, which enabled calculation of an LTCQ score for 89% of the sample. Table 2 summarises the content and Survey 1 response rates for individual items. Levels of missing data were low and broadly uniform across items, ranging from 1.0% (item 10, dependence; item 11, loneliness; item 20, living life as you want) to 2.2% (item 13, services difficult to cope with). The low levels of missing data for all individual items indicate acceptability of the LTCQ within this diverse sample.

### Floor / ceiling effects

For the total sample responses were generally skewed towards positive answers, with ceiling effects (i.e. less than 5% and more than 40% of respondents endorsing the most negative and positive response options, respectively)<sup>28</sup> observed in five items of the LTCQ (items 6, 7, 13, 14, and 18 – see Table 2). Ceiling effects were most pronounced for item 6 (home suitability) and item 7 (safety at home). These items convey content that was identified during previous qualitative phases of research as especially important for social care users, who represent a smaller portion of the sample. Whilst it is worth noting these item-level ceiling effects for their potential implications in population-level analyses, they are not in themselves problematic given the LTCQ's potential use for individual-level monitoring, where a key aim would be to identify and support the relatively smaller proportion of respondents who selected negative response options. No ceiling effect was observed for the measure as a whole (i.e. 15% or more of respondents achieving the highest possible score),<sup>20</sup> as less than 4% of respondents scored 100 on the LTCQ.

### Factor analysis

The dataset's suitability for factor analysis was assessed via Bartlett's test of sphericity (highly significant,  $p < 0.001$ ), the Kaiser-Meyer-Olkin (KMO) measure of sampling adequacy (0.96), and measures of sampling adequacy (MSA) (above 0.9 for each item). As indicated by the Intra-Cluster Correlation Coefficients reported for each item in Table 2, clustering effects by practice were very low (i.e. ICC values below 0.10 for all items); thus the results of factor analysis reported below were

1  
2  
3 interpreted as reasonably free from potential bias that could theoretically occur due to clustering of  
4 responses by recruitment site.  
5

6 Exploratory factor analysis was undertaken using principal axis factoring (PAF). Three factors were  
7 extracted via the Kaiser criterion (eigenvalue > 1), which explained 66% of variance: factor 1  
8 (eigenvalue 10.9, explaining 55% of variance), factor 2 (eigenvalue 1.2, explaining 6.0% of variance),  
9 factor 3 (eigenvalue 1.1, explaining 5.6% of variance). Over-extraction of factors is a recognised  
10 problem using this method,<sup>32,33</sup> and examination of the scree plot suggested that only the first factor  
11 should be retained. This was confirmed by Parallel Analysis,<sup>32</sup> which showed only the first factor with  
12 an eigenvalue exceeding the corresponding value generated for a random data matrix of the same  
13 size (20 items x 1082 respondents). For the one-factor solution, 19 LTCQ items loaded onto the  
14 general factor at levels ranging from 0.58 (good) to 0.86 (excellent),<sup>34</sup> with item 16 (knowledge  
15 about health conditions) loading less strongly (0.35). This evidence supports the LTCQ being scored  
16 as a single scale.  
17  
18  
19

20 To check against under-extraction of factors, three-factor solutions (indicated by the Kaiser criterion)  
21 were also examined. With orthogonal (Varimax) rotation, all 20 items loaded onto one of the three  
22 factors with a minimum loading of 0.35 (item 16; all other items loaded at 0.49 or higher), and  
23 fourteen items cross-loaded onto additional factor(s). When oblique rotation (Direct Oblimin) was  
24 applied, the same pattern of primary loadings was observed across the three factors, with two items  
25 (item 10, dependence; item 19, confidence to manage illness) also loading weakly onto another  
26 factor. In this analysis the three factors correlated substantially with each other ( $r > 0.6$  for all factor  
27 combinations), suggesting difficulty with interpreting and labelling the factors as distinct subscales.  
28 An examination of items within factors indicated that each factor contained multiple concepts; for  
29 example whilst factor 3 appeared to broadly group social and environmental influences on the  
30 management of LTCs, it contained conceptually distinct items on safety, suitability of the home, and  
31 social support. This observation is consistent with the conceptual framework from which items were  
32 developed,<sup>17</sup> in which 15 distinct concepts underpinned the 20 items tested in the initial validation  
33 survey. The items within each factor were summed and calibrated to yield dimension scores ranging  
34 from 0-100, which were suitable for factor analysis (Bartlett's test highly significant, KMO and MSA  
35 values all above 0.6). Higher-order factor analysis was undertaken using PAF and the Kaiser criterion;  
36 one factor was extracted with an eigenvalue of 2.3 that explained 75% of variance, with factor  
37 loadings of 0.93, 0.84, and 0.82. Thus the appropriateness of scoring the LTCQ as a single composite  
38 measure that captures the broad construct of 'living well with LTCs' was confirmed.  
39  
40  
41  
42  
43  
44  
45  
46

#### 47 **Internal consistency**

48 The LTCQ exhibits high internal consistency across its 20 items (Cronbach's  $\alpha = 0.95$ ). Corrected  
49 item-total correlations ranged from 0.35 (item 16, knowledge about health conditions) to 0.83 (item  
50 4, felt in control of daily life), with negligible improvement in  $\alpha$  if responses to item 16 were deleted.  
51 An examination of inter-item correlations showed that with one exception (item 3, able to be  
52 physically active and item 5, able to take part in enjoyable activities,  $r = 0.83$ ), associations between  
53 items were moderate rather than strong. No items were considered duplicates of other items and all  
54 items contributed substantially to the single scale; thus no items were deleted following initial  
55 analysis.  
56  
57  
58  
59  
60

### Test-retest reliability

Of 693 participants sent the follow-up questionnaire, 544 (78%) completed and returned Survey 2. LTCQ scores for the 383 participants (70%) who reported their health as 'about the same' as two weeks ago were analysed for test-retest reliability. The ICC (type 2: two-way random effects, absolute agreement) for overall LTCQ scores between Survey 1 and Survey 2 was 0.94 (95% CI, 0.93 to 0.95). Correlations for individual item responses between Survey 1 and Survey 2 were examined and found to be moderate or strong and significant for all items, ranging from 0.50 (item 16, knowledge about health conditions) to 0.83 (item 2, able to fulfil responsibilities). Frequencies of Survey 2 responses were examined and found to follow the same pattern of skewing towards the most positive response options as for Survey 1. Levels of missing data were similarly low (less than 2% missing for each item) for Survey 2 as for Survey 1, and high internal consistency of the scale ( $\alpha = 0.96$ ) was again observed for Survey 2 responses with complete LTCQ data (N=492).

### Sub-sample comparisons

The size and diversity of the sample enabled the comparison of LTCQ scores among different groups. Table 3a presents LTCQ score parameters and internal consistency measures for groups compared by cohort (health or social care), gender, age, number of conditions reported, and presence or absence of a mental health condition. ANOVA confirmed statistically significant differences in mean scores in a predictable pattern: LTCQ scores were lower for the social care cohort, women, the youngest (under 50) and oldest (over 85) age groups, high multi-morbidity (8 or more conditions reported), and the presence of at least one mental health condition. Internal consistency was high ( $\alpha > 0.9$ ) for all groups. The analysis was repeated for responses to the follow-up survey (N=492), with the same pattern observed (see Table 3b). Distributions of LTCQ scores by cohort (Figure 1) and mental health (Figure 2) are shown.

### Convergent construct validity

The sample's mean scores for the LTCQ, EQ-5D-5L, EQ-VAS, Self-efficacy scale, Activities of Daily Living (ADL) scale, and Bayliss burden of morbidity scale are shown in Table 4, alongside correlations (Spearman's rho) of the LTCQ score with all other measures. Associations between the LTCQ and all reference measures were moderate to strong and in the expected directions, i.e. positive for measures where higher scores indicated better outcomes (EQ-5D-5L, EQ-VAS, Self-efficacy scale), and negative for measures where higher scores indicated poorer outcomes (ADLs, Bayliss burden of morbidity). The collective strengths of association are notable given the different domains being captured across the measures (e.g. physical and emotional functioning, confidence to self-manage, impact of LTCs on daily activities). Further item-level analyses are ongoing, but initial results suggest that while some LTCQ items correlate with specific items from reference measures, other LTCQ items seem to be tapping into distinct domains that underpin the broader construct of 'living well with LTCs'. For example responses to LTCQ items reflecting personal autonomy (e.g. items 1-5) are associated with responses to mobility, self-care and usual activities items from the EQ-5D; and LTCQ items reflecting illness burden (items 9-15) are associated with the EQ-5D depression/anxiety item; but LTCQ items reflecting social and environmental influences on the impact of LTCs (e.g. social support, suitability of the home) are not strongly associated with items from existing measures.



1  
2  
3 Taken together this evidence indicates that the LTCQ score represents a more complex construct of  
4 'living well with LTCs' that draws together domains from multiple existing measures.  
5  
6  
7

## 8 **DISCUSSION**

9  
10 The LTCQ is a new generic PROM for capturing what it means to live well with long-term conditions.  
11 In this study the LTCQ was found to be acceptable to a large and diverse sample of health and social  
12 care users (N=1,211), with low levels of missing data across all items. For initial analysis an LTCQ  
13 score was only computed if all items were completed; but given that 98% of the sample completed  
14 18 items (90%) or more of the LTCQ, further work will explore the feasibility of imputing scores when  
15 one or two LTCQ items are missing. Internal consistency of the LTCQ is high, but analysis has not  
16 indicated direct repetition of content between items; this is consistent with the conceptual  
17 framework from which it was developed,<sup>17</sup> in which 15 distinct concepts underpinned the 20 items.  
18 Correlations with all reference measures (EQ-5D-5L, EQ-VAS, Self-efficacy scale, ADLs, Bayliss burden  
19 of morbidity) were strong and in the expected directions, supporting construct validity. Among this  
20 sample the LTCQ exhibited excellent test-retest reliability.  
21  
22  
23

24 A strength of the study was the sample's diversity in the number, type and severity of health  
25 conditions reported, which indicates that the LTCQ is relevant for use across different types of LTCs.  
26 The potentially wide applicability of the LTCQ suggests that it could play a role in operationalising  
27 integrated person-centred care, with particular relevance for people with multi-morbidity. That  
28 social care users have been specifically included in the sample is a further strength, suggesting that  
29 the LTCQ may be relevant for use in both health and social care settings. The range of reference  
30 measures used to validate the LTCQ is a third strength, demonstrating the complexity of 'living well  
31 with LTCs' that the LTCQ aims to measure, which is not fully captured by other existing measures.  
32  
33  
34

35 Weaknesses of the study include the lower response rate achieved among the social care cohort and  
36 the relative homogeneity of the sample in terms of ethnicity. The response rate for the health care  
37 cohort (31%) was broadly in line with that of a previous pilot study<sup>13</sup> and other national health  
38 surveys.<sup>8,35</sup> The lower response rate for the social care cohort (13%), who reported lower levels of  
39 'living well' in comparison to the health care cohort, may indicate less willingness or ability to  
40 engage with PROMs in comparison to other groups. These findings are not entirely unexpected given  
41 the similarity of this response rate to those of other projects assessing social care recipients.<sup>36</sup>  
42 Because the vast majority of participants in this study were white British, further testing is  
43 recommended to assess the relevance and acceptability of the LTCQ in other ethnic groups.  
44  
45  
46

47 The LTCQ provides a more holistic approach to outcome measurement, encompassing but moving  
48 beyond the focus on symptoms and functioning seen in existing generic health status measures such  
49 as the EQ-5D. The strong correlations of LTCQ scores with both the EQ-5D and the Self-efficacy scale  
50 suggest that the broad construct measured by the LTCQ captures both functional abilities and self-  
51 confidence to manage illness, among other domains. The availability of a valid, generic measure for  
52 monitoring the cumulative impacts of LTCs could play a key role in facilitating the shift to new  
53 models of person-centred care. Crucial to emerging goals for redesigned services is individuals'  
54 capabilities for managing the many demands of living with LTCs. Equally important is the extent to  
55 which people have positive self-worth and are able to participate in society through meaningful and  
56  
57  
58  
59  
60

1  
2  
3 rewarding activities, including employment. In line with current policy,<sup>37,38</sup> a generic PROM for LTCs  
4 should also assess key aspects of relevance to social care including safety, control over life and  
5 quality of support – concepts that are included in the LTCQ. In drawing together a unique range of  
6 health- and social care-related items, the LTCQ fills a distinct gap in the availability of measures that  
7 are appropriate for evaluating integrated services in the context of multi-morbidity.  
8  
9

10 A focus of future research will be to test the responsiveness of the LTCQ, which will be crucial for its  
11 potential use in routine monitoring. Furthermore, whilst this initial validation study has  
12 demonstrated the LTCQ's relevance for people with a diverse range of LTCs (including multi-  
13 morbidity), further validation work is needed in populations not represented here, for example  
14 those with dementia or learning difficulties, and those for whom English is not their first language.  
15 Translatability assessment of the LTCQ was undertaken during an earlier phase of its development<sup>18</sup>  
16 and concluded that it could be translated into multiple languages (e.g. French, Polish, Arabic, Urdu,  
17 simplified Chinese). Following translation, the acceptability, validity and reliability of the LTCQ would  
18 need to be tested through further studies in non-English contexts. Further structural validation work,  
19 for example employing Rasch analysis or bifactor models, would also contribute to the evidence  
20 base for this new measure.  
21  
22  
23  
24

## 25 CONCLUSIONS

26  
27 This paper provides encouraging evidence for the reliability and validity of the Long-Term Conditions  
28 Questionnaire (LTCQ), a new instrument for measuring 'living well' in the context of chronic illness.  
29 As a generic PROM that taps into a broad range of domains relevant for both health and social care  
30 settings, the LTCQ could meet a distinct need for holistic outcome measurement that facilitates  
31 integrated service provision. The measure's reliability among all sub-groups within this diverse  
32 validation sample, coupled with previously reported evidence of content validity,<sup>18</sup> indicates that the  
33 LTCQ is relevant and acceptable for people with single or multiple LTCs, encompassing both physical  
34 and mental health conditions. In the context of increasing multi-morbidity, a generic PROM that  
35 comprehensively captures what it means to live well with LTCs from the individual's perspective  
36 could support the implementation of person-centred care.  
37  
38  
39  
40

## 41 ACKNOWLEDGEMENTS

42  
43 We thank the participants with long-term conditions for taking part in this study, and all of the  
44 organisations who helped us to recruit participants. We also thank Ann-Marie Towers for her  
45 assistance with the development of the LTCQ, and we thank Jane Dennett, Ed Ludlow and Alan  
46 Dargan for supporting the social care research team during recruitment.  
47  
48  
49

## 50 COMPETING INTERESTS

51  
52 All authors declare: some authors had financial (salary) support from the two funding bodies listed  
53 below for the submitted work; no financial relationships with any other organisations that might  
54 have an interest in the submitted work in the previous three years; no other relationships or  
55 activities that could appear to have influenced the submitted work.  
56  
57  
58  
59  
60

## FUNDING

This research was funded by the Policy Research Programme (PRP) in the Department of Health England, which supports the Quality and Outcomes of Person-centred Care Policy Research Unit (QORU), and by the National Institute for Health Research (NIHR) Collaboration for Leadership in Applied Health Research and Care (CLAHRC) Oxford at Oxford Health NHS Foundation Trust. The views expressed are those of the authors and not necessarily those of the NHS, the NIHR or the Department of Health.

## AUTHOR CONTRIBUTIONS

RF, JF, AC, CJ and MP conceived the study. RF and JF secured its funding and managed its overall direction. JB and MB contributed to study design, ethics considerations and interpretation of study results as patient/public members of the research team. MP, LB and KJ led on securing ethics and other approvals for the study. AC, EG and CJ advised on data collection and data interpretation throughout the study. MP, CP, LB, LG, CA, LK, DF and KJ were jointly responsible for participant recruitment (including working with participating organisations and developing the database search protocol) and for all aspects of data management (collection, entry, checking). CP and MP led the analysis with direction from RF and CJ. CP drafted the paper, which was critically reviewed by all authors. All authors contributed to revisions and approved the final version of the manuscript.

## DATA SHARING STATEMENT

As stated in the approved study protocol, only members of the research team (i.e. study authors) have access to the study data. The full anonymised data set was shared between all team members (University of Oxford and University of Kent). Direct access will be granted to authorised representatives from the Sponsor or host institution for monitoring and/or audit of the study to ensure compliance with regulations.

## REFERENCES

1. Barnett K, Mercer SW, Norbury M, Watt G, Wyke S, Guthrie B. Epidemiology of multimorbidity and implications for health care, research, and medical education: a cross-sectional study. *Lancet*. 2012;380(9836):37-43.
2. World Health Organization. Global status report on noncommunicable diseases. Geneva: WHO Press; 2014. Available from: <http://www.who.int/nmh/publications/ncd-status-report-2014/en/>
3. Department of Health England. Long Term Conditions Compendium of Information: Third Edition. Epub 2012 May 30. Available from: [https://www.gov.uk/government/uploads/system/uploads/attachment\\_data/file/216528/dh\\_134486.pdf](https://www.gov.uk/government/uploads/system/uploads/attachment_data/file/216528/dh_134486.pdf)
4. Marshall S, Haywood K, Fitzpatrick R. Impact of patient-reported outcome measure on routine practice: a structured review. *J Eval Clin Prac* 2006;12(5):559-568.
5. Morgan HM, Entwistle VA, Cribb A, Christmas S, Owens J, Skea ZC, et al. We need to talk about purpose: a critical interpretive synthesis of health and social care professionals' approaches to self-management support for people with long-term conditions. *Health*



- 1  
2  
3 expectations: an international journal of public participation in health care and health policy.  
4 2016;20:243-259.
- 5  
6 6. Entwistle VA, Cribb A, Owens J. Why Health and Social Care Support for People with Long-  
7 Term Conditions Should be Oriented Towards Enabling Them to Live Well. *Health Care Anal.*  
8 Epub 2016 Nov 28.
- 9  
10 7. Makai P, Brouwer WBF, Koopmanschap MA, Stolk EA, Nieboer AP. Quality of life instruments  
11 for economic evaluation in health and social care for older people : A systematic review. *Soc*  
12 *Sci Med.* 2014;102:83-93.
- 13  
14 8. Mujica-Mota RE, Roberts M, Abel G, Elliott M, Lyratzopoulos G, Roland M, et al. Common  
15 patterns of morbidity and multi-morbidity and their impact on health-related quality of life :  
16 evidence from a national survey. *Qual Life Res.* 2015;24:909-918.
- 17  
18 9. The EuroQol Group. EuroQol – a new facility for the measurement of health-related quality  
19 of life. *Health Policy.* 1990;16:199-208.
- 20  
21 10. Ware JE, Sherbourne CD. The MOS 36-Item Short-Form Health Survey (SF-36): Conceptual  
22 Framework and Item Selection. *Med Care.* 1992;30(6):473-483.
- 23  
24 11. Matza LS, Boye KS, Stewart KD, Curtis BH, Reaney M, Landrian AS. A qualitative examination  
25 of the content validity of the EQ-5D-5L in patients with type 2 diabetes. *Health Qual Life*  
26 *Outcomes.* 2015;13:192.
- 27  
28 12. Coulter A. Measuring what matters to patients. *BMJ* 2017;356:j816. Epub 2017 Feb 20.
- 29  
30 13. Peters M, Crocker H, Dummett S, Jenkinson C, Doll H, Fitzpatrick R. Change in health status  
31 in long-term conditions over a one year period : a cohort survey using patient-reported  
32 outcome measures. *Health Qual Life Outcomes* 2014;12:123.
- 33  
34 14. Forder JE, Caiels J. Measuring the outcomes of long-term care. *Soc Sci Med.* 2011;73:1766-  
35 1774.
- 36  
37 15. Røsstad T, Garåsen H, Steinsbekk A, Sletvold O, Grimsmo A. Development of a patient-  
38 centred care pathway across healthcare providers: a qualitative study. *BMC Health Serv Res.*  
39 2013;13:121.
- 40  
41 16. Hunter C, Fitzpatrick R, Jenkinson C, Darlington AE, Coulter A, Forder JE, et al. Perspectives  
42 from health, social care and policy stakeholders on the value of a single self-report outcome  
43 measure across long-term conditions: a qualitative study. *BMJ Open.* 2015;5:e006986.
- 44  
45 17. Peters M, Potter CM, Kelly L, Hunter C, Gibbons E, Jenkinson C, et al. The Long-Term  
46 Conditions Questionnaire : conceptual framework and item development. *Patient Related*  
47 *Outcome Measures.* 2016;7:109-125.
- 48  
49 18. Kelly L, Potter CM, Hunter C, Gibbons E, Fitzpatrick R, Jenkinson C, et al. Refinement of the  
50 Long-Term Conditions Questionnaire (LTCQ): patient and expert stakeholder opinion. *Patient*  
51 *Related Outcome Measures.* 2016;7:183-193.
- 52  
53 19. von Elm E, Altman DG, Egger M, Pocock SJ, Gøtzsche PC, Vandenbroucke JP; STROBE  
54 Initiative. The Strengthening the Reporting of Observational Studies in Epidemiology  
55 (STROBE) statement: guidelines for reporting observational studies. *J Clin Epidemiol.*  
56 2008;61(4):344-349.
- 57  
58 20. Terwee CB, Bot SDM, de Boer MR, van der Windt DAWM, Knol DL, Dekker J, et al. Quality  
59 criteria were proposed for measurement properties of health status questionnaires. *J Clin*  
60 *Epidemiol.* 2007;60:34-42.
21. NHS Digital. Quality and Outcomes Framework. Epub 2016. Available from :  
<http://content.digital.nhs.uk/qof>

- 1
- 2
- 3 22. NHS Digital (2016) Short and Long-term Support (SALT) 2016. Available from:  
4 <http://content.digital.nhs.uk/datacollections/SALT>
- 5
- 6 23. Herdman M, Gudex C, Lloyd A, Janssen MF, Kind P, Parkin D, et al. Development and  
7 preliminary testing of the new five-level version of EQ-5D (EQ-5D-5L). *Quality Life Res.*  
8 2011;20(10):1727-1736.
- 9
- 10 24. Lorig KR, Sobel DS, Ritter PL, Laurent D, Hobbs M. Effect of a self-management program on  
11 patients with chronic disease. *Eff Clin Pract.* 2001;4:256-262.
- 12
- 13 25. Blake M, Gray M, Balarajan M, Darton R, Hancock R, Henderson C, et al. Social care for older  
14 people aged 65+: Questionnaire documentation. NatCen Social Research. Epub 2010.  
15 Available from: <http://www.natcen.ac.uk/media/205502/social-care-questionnaire.pdf>
- 16
- 17 26. Bayliss EA, Ellis JL, Steiner JF. Subjective assessments of comorbidity correlate with quality of  
18 life health outcomes: Initial validation of a comorbidity assessment instrument. *Health Qual*  
19 *Life Outcomes* 2005;3:51.
- 20
- 21 27. Netten A, Burge P, Malley J, Potoglou D, Towers A, Brazier J, et al. Outcomes of Social Care  
22 for Adults: Developing a Preference-Weighted Measure. *Health Technology Assessment.*  
23 2012;16(16):1-165. Available from: <http://dx.doi.org/10.3310/hta16160>
- 24
- 25 28. Petrillo J, Cano SJ, McLeod LD, Coon CD. Using Classical Test Theory, Item Response Theory,  
26 and Rasch Measurement Theory to evaluate patient-reported outcome measures: a  
27 comparison of worked examples. *Value in Health.* 2015;18:25-34.
- 28
- 29 29. Streiner DL, Norman GR, Cairney J. *Health measurement scales: a practical guide to their*  
30 *development and use*, 5<sup>th</sup> edition. 2015;Oxford: Oxford University Press.
- 31
- 32 30. Littenberg B, MacLean CD. Intra-cluster correlation coefficients in adults with diabetes in  
33 primary care practices: the Vermont Diabetes Information System field survey. *BMC Medical*  
34 *Research Methodology.* 2006;6:20. Available from: <https://doi.org/10.1186/1471-2288-6-20>
- 35
- 36 31. Devlin N, Shah K, Feng Y, Mulhern B, van Hout B. Valuing health-related quality of life: An  
37 EQ-5D-5L value set for England. Office of Health Economics Research, Research Paper 16/01.  
38 Epub January 2016. Available from: [https://www.ohe.org/publications/valuing-health-](https://www.ohe.org/publications/valuing-health-related-quality-life-eq-5d-5l-value-set-england)  
39 [related-quality-life-eq-5d-5l-value-set-england](https://www.ohe.org/publications/valuing-health-related-quality-life-eq-5d-5l-value-set-england)
- 40
- 41 32. Franklin SB, Gibson DJ, Robertson PA, Pohlmann JT, Fralish JS. Parallel Analysis: A method for  
42 determining significant principal components. *Journal of Vegetation Science.* 1995;6:99-106.
- 43
- 44 33. Reise SP, Waller NG, Comrey AL. Factor analysis and scale revision. *Psychological*  
45 *Assessment.* 2000;12:287-297.
- 46
- 47 34. Comrey AL, Lee HB. *A first course in factor analysis*, 2<sup>nd</sup> edition. Hillsdale, NJ: Lawrence  
48 Erlbaum.
- 49
- 50 35. Ipsos MORI on behalf of NHS England. GP Patient Survey – National summary report. Epub  
51 2016 July 7. Available from : [http://gp-survey-](http://gp-survey-production.s3.amazonaws.com/archive/2016/July/July2016NationalSummaryReport.pdf)  
52 [production.s3.amazonaws.com/archive/2016/July/July2016NationalSummaryReport.pdf](http://gp-survey-production.s3.amazonaws.com/archive/2016/July/July2016NationalSummaryReport.pdf)
- 53
- 54 36. Forder J, Malley J, Rand S, Vadean F, Jones K, Netten A. Identifying the impact of adult social  
55 care (IIASC report): Interpreting outcome data for use in the Adult Social Care Outcomes  
56 Framework. Personal Social Services Discussion Paper 2892, University of Kent, Canterbury.  
57 Epub 2016 January. Available from: <http://www.pssru.ac.uk/archive/pdf/4633.pdf>
- 58
- 59 37. Department of Health England. NHS Outcomes Framework: at-a-glance. Epub 2016 April.  
60 Available from:  
[https://www.gov.uk/government/uploads/system/uploads/attachment\\_data/file/513157/N](https://www.gov.uk/government/uploads/system/uploads/attachment_data/file/513157/NHSOF_at_a_glance.pdf)  
[HSOF\\_at\\_a\\_glance.pdf](https://www.gov.uk/government/uploads/system/uploads/attachment_data/file/513157/NHSOF_at_a_glance.pdf)

- 1  
2  
3 38. Adult Social Care Statistics, NHS Digital. Measures from the Adult Social Care Outcomes  
4 Framework England 2015-16. Epub 2016 Oct 5. Available from:  
5 [http://www.content.digital.nhs.uk/catalogue/PUB21900/meas-from-asc-of-eng-1516-](http://www.content.digital.nhs.uk/catalogue/PUB21900/meas-from-asc-of-eng-1516-Report.pdf)  
6 [Report.pdf](http://www.content.digital.nhs.uk/catalogue/PUB21900/meas-from-asc-of-eng-1516-Report.pdf)  
7  
8  
9  
10  
11  
12  
13  
14  
15  
16  
17  
18  
19  
20  
21  
22  
23  
24  
25  
26  
27  
28  
29  
30  
31  
32  
33  
34  
35  
36  
37  
38  
39  
40  
41  
42  
43  
44  
45  
46  
47  
48  
49  
50  
51  
52  
53  
54  
55  
56  
57  
58  
59  
60

For peer review only

Table 1. Participant characteristics (N=1,211)

|                                | <u>Response option</u>              | <u>N (%)</u> |                                                     | <u>Response option</u>                          | <u>N (%)</u> |
|--------------------------------|-------------------------------------|--------------|-----------------------------------------------------|-------------------------------------------------|--------------|
| <b>Recruitment</b>             | Health care (via GP practice)       | 917 (76%)    | <b>Employment</b>                                   | Retired from work                               | 554 (46%)    |
|                                | Social care (via Local Authority)   | 294 (24%)    |                                                     | Permanently sick or disabled                    | 218 (18%)    |
| <b>Age</b>                     | 18-49 years                         | 162 (13%)    | Employed / full-time education                      | 211 (17%)                                       |              |
|                                | 50-64 years                         | 277 (23%)    | Doing something else (e.g. volunteering)            | 85 (7%)                                         |              |
|                                | 65-74 years                         | 331 (27%)    | Unemployed                                          | 31 (3%)                                         |              |
|                                | 75-84 years                         | 259 (21%)    | (missing)                                           | 112 (9%)                                        |              |
|                                | 85+ years                           | 128 (11%)    | <b>Marital status</b>                               | Married / civil partnership                     | 648 (54%)    |
| (missing)                      | 54 (5%)                             | Widowed      |                                                     | 224 (19%)                                       |              |
| <b>Gender</b>                  | Female                              | 656 (54%)    |                                                     | Divorced / separated                            | 168 (14%)    |
|                                | Male                                | 528 (44%)    |                                                     | Single / never married                          | 144 (12%)    |
|                                | (missing)                           | 27 (2%)      | (missing)                                           | 27 (2%)                                         |              |
| <b>Condition*<br/>reported</b> | Depression / anxiety                | 508 (42%)    | <b>Ethnicity</b>                                    | White British                                   | 1097 (91%)   |
|                                | Chronic back pain                   | 450 (37%)    |                                                     | Other White (e.g. Irish, European)              | 38 (3%)      |
|                                | Diabetes                            | 313 (26%)    |                                                     | Black / Black British (e.g. African, Caribbean) | 18 (2%)      |
|                                | Osteoarthritis                      | 308 (25%)    |                                                     | Asian / Asian British (e.g. Indian, Pakistani)  | 17 (1%)      |
|                                | Colon problems (e.g. IBS)           | 290 (24%)    |                                                     | Mixed                                           | 8 (0.6%)     |
|                                | Heart disease                       | 284 (24%)    |                                                     | (missing)                                       | 33 (3%)      |
|                                | COPD                                | 188 (16%)    | <b>Help needed<br/>completing<br/>questionnaire</b> | No help                                         | 896 (74%)    |
|                                | Stroke                              | 185 (15%)    |                                                     | Had help, but answers are my own                | 227 (19%)    |
|                                | Cancer within the last 5 years      | 166 (14%)    |                                                     | Someone answered for me (proxy)                 | 74 (6%)      |
|                                | Bipolar / psychosis / schizophrenia | 88 (7%)      |                                                     | (missing)                                       | 14 (1%)      |
| Multiple Sclerosis             | 75 (6%)                             |              |                                                     |                                                 |              |

\*Percentages for Condition reported exceed 100% because most participants reported multiple conditions.

Table 2. LTCQ item responses (N = 1,211)

| Item                                                       | Never | Rarely | Sometimes | Often | Always | Missing | Not applicable** | ICCC  |
|------------------------------------------------------------|-------|--------|-----------|-------|--------|---------|------------------|-------|
| 1. Able to cope well with health conditions                | 3%    | 10%    | 29%       | 26%   | 31%    | 1.50%   |                  | 0.059 |
| 2. Able to fulfil responsibilities                         | 12%   | 15%    | 20%       | 18%   | 32%    | 1.90%   |                  | 0.037 |
| 3. Able to be as physically active as you wanted           | 21%   | 20%    | 21%       | 17%   | 20%    | 1.20%   |                  | 0.023 |
| 4. Felt in control of daily life                           | 8%    | 13%    | 22%       | 21%   | 35%    | 1.30%   |                  | 0.064 |
| 5. Able to take part in activities you enjoy               | 16%   | 22%    | 22%       | 17%   | 21%    | 1.40%   |                  | 0.035 |
| 6. Felt that your home is suitable for your needs          | 4%    | 5%     | 15%       | 18%   | 56%    | 1.50%   |                  | 0.040 |
| 7. Felt safe at home                                       | 2%    | 4%     | 10%       | 19%   | 64%    | 1.20%   |                  | 0.028 |
| 8. Felt safe outside the home                              | 9%    | 10%    | 23%       | 18%   | 38%    | 2.00%   |                  | 0.060 |
| 9. Felt bothered by symptoms*                              | 9%    | 12%    | 33%       | 26%   | 19%    | 1.50%   |                  | 0.039 |
| 10. Felt more dependent on others than you wanted*         | 19%   | 13%    | 20%       | 21%   | 27%    | 1.00%   |                  | 0.027 |
| 11. Felt lonely due to health conditions*                  | 34%   | 15%    | 24%       | 15%   | 11%    | 1.00%   |                  | 0.036 |
| 12. Worried about being treated differently*               | 39%   | 17%    | 25%       | 10%   | 7%     | 1.50%   |                  | 0.053 |
| 13. Found health/other services difficult to cope with*    | 20%   | 13%    | 19%       | 6%    | 3%     | 2.20%   | 36%              | 0.037 |
| 14. Found treatments difficult to cope with*               | 31%   | 21%    | 19%       | 8%    | 4%     | 1.40%   | 17%              | 0.033 |
| 15. Felt that your health conditions made you unhappy*     | 20%   | 16%    | 31%       | 18%   | 13%    | 1.30%   |                  | 0.068 |
| 16. Felt you knew enough about your health conditions      | 5%    | 11%    | 24%       | 26%   | 32%    | 2.10%   |                  | 0.005 |
| 17. Had enough social contact with people                  | 5%    | 13%    | 21%       | 21%   | 38%    | 2.10%   |                  | 0.052 |
| 18. Had enough support to cope well with health conditions | 4%    | 9%     | 21%       | 25%   | 40%    | 1.40%   |                  | 0.060 |
| 19. Felt confident in managing health conditions           | 6%    | 8%     | 23%       | 22%   | 40%    | 1.20%   |                  | 0.052 |
| 20. Able to live your life as you want                     | 16%   | 17%    | 20%       | 18%   | 28%    | 1.00%   |                  | 0.043 |

\* Questions 9-15 are reverse-scored, i.e. 'Never' is the most positive response option

\*\*Questions 13 and 14 have an additional response option: 'have not received any health-related services / treatments in the past four weeks'. For analysis these responses were coded as 'Never'.

ICCC = Intra-Cluster Correlation Coefficient, for item responses across recruiting GP practices. Coefficients approaching zero indicate negligible variance in responses across clusters (practices); a coefficient of 1 would indicate that all responses within a given cluster (practice) were identical i.e. all variance in responses is explained by cluster.

Table 3a. Comparison of LTCQ scores among sub-samples (main survey)

| <b>LTCQ - main survey</b>    |                                               | <u>N</u>    | <u>Mean</u> | <u>SD</u>   | <u>SE</u>   | <u>95% CI</u>      | <u>α</u>    | <u>ANOVA</u>                      |
|------------------------------|-----------------------------------------------|-------------|-------------|-------------|-------------|--------------------|-------------|-----------------------------------|
|                              | <b>Total sample</b>                           | <b>1082</b> | <b>65.1</b> | <b>23.0</b> | <b>0.70</b> | <b>63.7 - 66.5</b> | <b>0.95</b> |                                   |
| <b>cohort</b>                | Health care sample                            | 838         | 70.0        | 21.7        | 0.75        | 68.6 - 71.5        | 0.95        | F (1, 1080) = 201.8,<br>p < 0.001 |
|                              | Social care sample                            | 244         | 48.2        | 19.1        | 1.22        | 45.8 - 50.8        | 0.92        |                                   |
| <b>gender</b>                | male                                          | 482         | 68.5        | 22.6        | 1.03        | 66.4 - 70.5        | 0.96        | F (1, 1057) = 19.8,<br>p < 0.001  |
|                              | female                                        | 577         | 62.2        | 23.0        | 0.96        | 60.3 - 64.1        | 0.95        |                                   |
| <b>age<sup>a</sup></b>       | 18-64 years                                   | 413         | 59.7        | 23.3        | 1.15        | 57.5 - 62.0        | 0.95        | F (2, 1032) = 27.4,<br>p < 0.001  |
|                              | 65-84 years                                   | 525         | 70.2        | 21.7        | 0.95        | 68.3 - 72.0        | 0.95        |                                   |
|                              | 85+ years                                     | 97          | 60.2        | 22.6        | 2.30        | 55.7 - 64.8        | 0.95        |                                   |
| <b>morbidity<sup>b</sup></b> | 1 LTC                                         | 60          | 76.5        | 21.3        | 2.74        | 71.0 - 82.0        | 0.94        | F (3, 1057) = 75.3,<br>p < 0.001  |
|                              | 2-4 LTCs                                      | 320         | 73.9        | 21.3        | 1.19        | 71.5 - 76.2        | 0.95        |                                   |
|                              | 5-7 LTCs                                      | 351         | 67.9        | 21.5        | 1.15        | 65.7 - 70.2        | 0.95        |                                   |
|                              | 8+ LTCs                                       | 330         | 51.1        | 20.1        | 1.11        | 49.0 - 53.3        | 0.93        |                                   |
| <b>mental health</b>         | no mental health condition reported           | 624         | 74.2        | 20.2        | 0.81        | 72.6 - 75.8        | 0.94        | F (1, 1080) = 291.2,<br>p < 0.001 |
|                              | at least one mental health condition reported | 458         | 52.7        | 20.8        | 0.97        | 50.8 - 54.6        | 0.94        |                                   |

N = sample size Mean = mean LTCQ score for sub-sample SD = standard deviation SE = standard error of the mean 95% CI = 95% confidence interval  
α = Cronbach's alpha (internal consistency) for 20 LTCQ items among sub-group ANOVA = one-way between-groups analysis of variance of LTCQ scores

- a. Post-hoc analysis (Tukey HSD) indicated that LTCQ scores were significantly higher for the 65-84 years age group compared to both other age groups (p < 0.001).
- b. Post-hoc analysis (Tukey HSD) indicated that LTCQ scores were significantly lower for those with 5-7 LTCs compared to those with one LTC (p < 0.05) and compared to those with 2-4 LTCs (p < 0.01). LTCQ scores were significantly lower for those with 8+ LTCs compared to all other groups (p < 0.001).

Table 3b. Comparison of LTCQ scores among sub-samples (follow-up survey)

| <b>LTCQ - follow-up survey</b> |                                               | <b>N</b>   | <b>Mean</b> | <b>SD</b>   | <b>SE</b>   | <b>95% CI</b>      | <b><math>\alpha</math></b> | <b>ANOVA</b>        |
|--------------------------------|-----------------------------------------------|------------|-------------|-------------|-------------|--------------------|----------------------------|---------------------|
|                                | <b>Total sample</b>                           | <b>492</b> | <b>65.5</b> | <b>23.4</b> | <b>1.05</b> | <b>63.4 - 67.5</b> | <b>0.96</b>                |                     |
| <b>cohort</b>                  | Health care sample                            | 379        | 70.3        | 22.3        | 1.15        | 68.0 - 72.6        | 0.96                       | F (1, 490) = 82.4   |
|                                | Social care sample                            | 113        | 49.2        | 19.3        | 1.82        | 45.6 - 52.8        | 0.92                       | p < 0.001           |
| <b>gender</b>                  | male                                          | 229        | 68.7        | 22.8        | 1.50        | 65.8 - 71.7        | 0.96                       | F (1, 480) = 8.0,   |
|                                | female                                        | 253        | 62.8        | 23.4        | 1.47        | 59.9 - 65.7        | 0.96                       | p < 0.01            |
| <b>age<sup>a</sup></b>         | 18-64 years                                   | 184        | 58.8        | 23.8        | 1.76        | 55.3 - 62.3        | 0.96                       | F (2, 469) = 14.4,  |
|                                | 65-84 years                                   | 250        | 70.6        | 22.1        | 1.39        | 67.9 - 73.4        | 0.96                       | p < 0.001           |
|                                | 85+ years                                     | 38         | 65.6        | 20.7        | 3.35        | 58.8 - 72.4        | 0.94                       |                     |
| <b>morbidity<sup>b</sup></b>   | 1 LTC                                         | 22         | 78.2        | 18.3        | 3.89        | 70.1 - 86.3        | 0.93                       |                     |
|                                | 2-4 LTCs                                      | 157        | 76.2        | 19.9        | 1.59        | 73.1 - 79.4        | 0.95                       | F (3, 482) = 43.9,  |
|                                | 5-7 LTCs                                      | 143        | 67.7        | 23.6        | 1.97        | 63.8 - 71.6        | 0.97                       | p < 0.001           |
|                                | 8+ LTCs                                       | 164        | 50.9        | 19.4        | 1.51        | 47.9 - 53.9        | 0.93                       |                     |
| <b>mental health</b>           | no mental health condition reported           | 290        | 74.6        | 20.1        | 1.18        | 72.4 - 77.1        | 0.95                       | F (1, 490) = 144.2, |
|                                | at least one mental health condition reported | 202        | 52.1        | 21.3        | 1.50        | 49.1 - 55.0        | 0.95                       | p < 0.001           |

N = sample size Mean = mean LTCQ score for sub-sample SD = standard deviation SE = standard error of the mean 95% CI = 95% confidence interval

$\alpha$  = Cronbach's alpha (internal consistency) for 20 LTCQ items among sub-group ANOVA = one-way between-groups analysis of variance of LTCQ scores

a. Post-hoc analysis (Tukey HSD) indicated that LTCQ scores were significantly higher for the 65-84 years age group compared to the 18-64 years age group (p < 0.001).

b. Post-hoc analysis (Tukey HSD) indicated that LTCQ scores were significantly lower for those with 5-7 LTCs compared to those with 2-4 LTCs (p < 0.01). LTCQ scores were significantly lower for those with 8+ LTCs compared to all other groups (p < 0.001).



Table 4. Construct validity

| Measure                     | Mean score (SD, SE, 95% CI)    | Score range | Interpretation of higher score                  | Correlation with LTCQ score (Spearman's rho) |
|-----------------------------|--------------------------------|-------------|-------------------------------------------------|----------------------------------------------|
| LTCQ                        | 65.1 (23.0, 0.70, 63.7 – 66.5) | 0 to 100    | living better with long-term conditions         | -                                            |
| EQ-5D-5L                    | 0.62 (0.33, 0.01, 0.60 – 0.63) | -0.28 to 1  | better health-related quality of life           | 0.82***                                      |
| EQ-VAS                      | 62.4 (24.6, 0.72, 61.0 – 63.8) | 0 to 100    | better health-related quality of life           | 0.79***                                      |
| Self-efficacy scale         | 6.2 (2.7, 0.08, 6.1 – 6.4)     | 1 to 10     | greater confidence for managing chronic disease | 0.87***                                      |
| Activities of Daily Living  | 5.0 (4.8, 0.14, 4.7 – 5.3)     | 0 to 13     | more problems with activities of daily living   | - 0.79***                                    |
| Bayliss burden of morbidity | 16.4 (13.1, 0.38, 15.7 – 17.2) | 0 to 150    | more limits on daily activities from LTCs       | -0.64***                                     |

\*\*\*Correlation is significant at p < 0.001 (2-tailed).

SD = standard deviation SE = standard error of the mean 95% CI = 95% confidence interval

1  
2  
3  
4  
5 **Figure legend**  
6

7 Figure 1. Comparison of LTCQ score distributions: health care versus social care cohorts  
8

9 Figure 2. Comparison of LTCQ score distributions: mental versus physical health condition(s)  
10  
11  
12  
13  
14  
15  
16  
17  
18  
19  
20  
21  
22  
23  
24  
25  
26  
27  
28  
29  
30  
31  
32  
33  
34  
35  
36  
37  
38  
39  
40  
41  
42  
43  
44  
45  
46  
47  
48  
49

1  
2  
3  
4  
5  
6  
7  
8  
9  
10  
11  
12  
13  
14  
15  
16  
17  
18  
19  
20  
21  
22  
23  
24  
25  
26  
27  
28  
29  
30  
31  
32  
33  
34  
35  
36  
37  
38  
39  
40  
41  
42  
43  
44  
45  
46  
47  
48  
49  
50  
51  
52  
53  
54  
55  
56  
57  
58  
59  
60

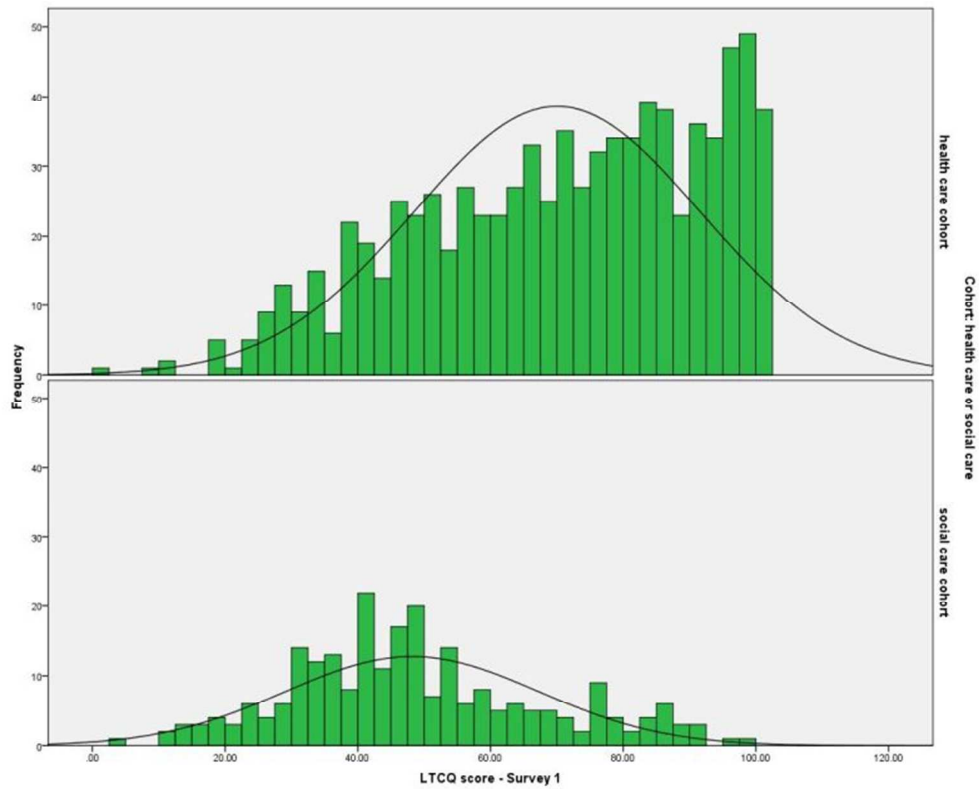

Figure 1. Comparison of LTCQ score distributions: health care versus social care cohorts

67x54mm (300 x 300 DPI)

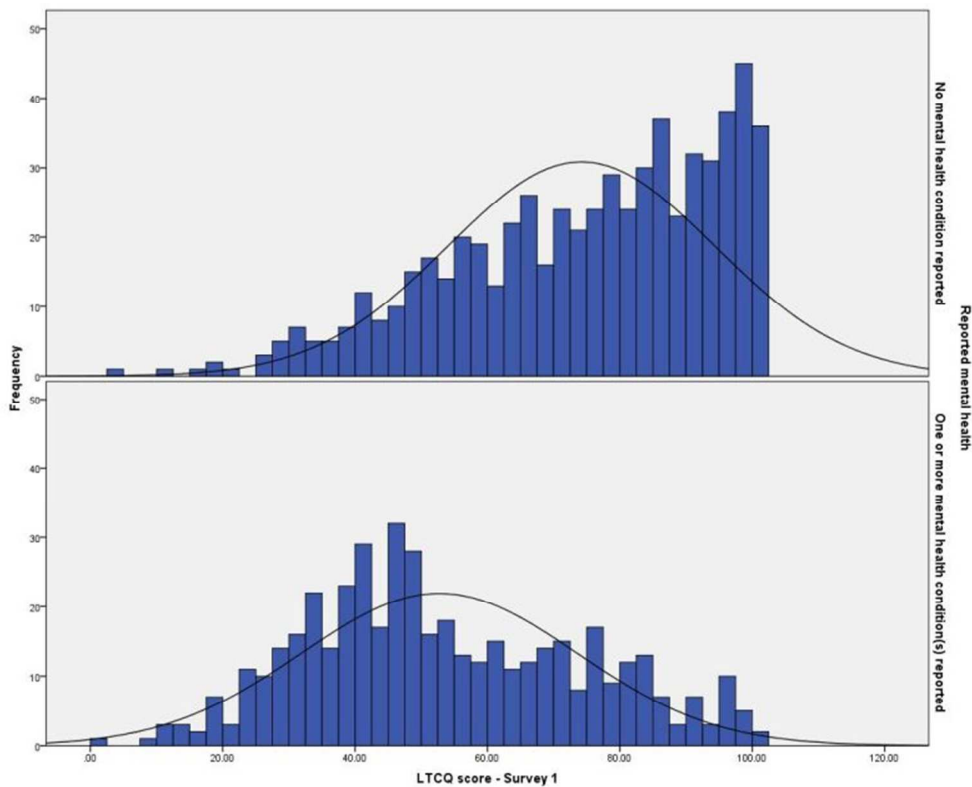

Figure 2. Comparison of LTCQ score distributions: mental versus physical health condition(s)

67x54mm (300 x 300 DPI)

For peer review only

1  
2  
3  
4  
5  
6  
7  
8  
9  
10  
11  
12  
13  
14  
15  
16  
17  
18  
19  
20  
21  
22  
23  
24  
25  
26  
27  
28  
29  
30  
31  
32  
33  
34  
35  
36  
37  
38  
39  
40  
41  
42  
43  
44  
45  
46  
47  
48  
49  
50  
51  
52  
53  
54  
55  
56  
57  
58  
59  
60

STROBE Statement—Checklist of items that should be included in reports of *cross-sectional studies*

|                           | Item No | Recommendation                                                                                                                                                                       | Location in paper                                                |
|---------------------------|---------|--------------------------------------------------------------------------------------------------------------------------------------------------------------------------------------|------------------------------------------------------------------|
| <b>Title and abstract</b> | 1       | (a) Indicate the study's design with a commonly used term in the title or the abstract                                                                                               | Title – p.1<br>Abstract – p.2                                    |
|                           |         | (b) Provide in the abstract an informative and balanced summary of what was done and what was found                                                                                  | Abstract – p.2                                                   |
| <b>Introduction</b>       |         |                                                                                                                                                                                      |                                                                  |
| Background/rationale      | 2       | Explain the scientific background and rationale for the investigation being reported                                                                                                 | p.3                                                              |
| Objectives                | 3       | State specific objectives, including any prespecified hypotheses                                                                                                                     | p.3                                                              |
| <b>Methods</b>            |         |                                                                                                                                                                                      |                                                                  |
| Study design              | 4       | Present key elements of study design early in the paper                                                                                                                              | Abstract – p.2,<br>Methods – p.4                                 |
| Setting                   | 5       | Describe the setting, locations, and relevant dates, including periods of recruitment, exposure, follow-up, and data collection                                                      | Methods – p.4-5                                                  |
| Participants              | 6       | (a) Give the eligibility criteria, and the sources and methods of selection of participants                                                                                          | Methods (Participant recruitment) – p.4-5                        |
| Variables                 | 7       | Clearly define all outcomes, exposures, predictors, potential confounders, and effect modifiers. Give diagnostic criteria, if applicable                                             | Methods (The Surveys) – p.5                                      |
| Data sources/ measurement | 8*      | For each variable of interest, give sources of data and details of methods of assessment (measurement). Describe comparability of assessment methods if there is more than one group | Methods (Analysis) – p.5-6                                       |
| Bias                      | 9       | Describe any efforts to address potential sources of bias                                                                                                                            | Methods (Participant recruitment) – p.4-5                        |
| Study size                | 10      | Explain how the study size was arrived at                                                                                                                                            | Methods – p.4                                                    |
| Quantitative variables    | 11      | Explain how quantitative variables were handled in the analyses. If applicable, describe which groupings were chosen and why                                                         | Methods (Analysis) – p.5-6                                       |
| Statistical methods       | 12      | (a) Describe all statistical methods, including those used to control for confounding                                                                                                | Methods (Analysis) – p.5-6                                       |
|                           |         | (b) Describe any methods used to examine subgroups and interactions                                                                                                                  | Methods (Analysis) – p.6, Results (Sub-sample comparisons) – p.9 |
|                           |         | (c) Explain how missing data were addressed                                                                                                                                          | Methods (Analysis) – p.6                                         |
|                           |         | (d) If applicable, describe analytical methods taking account of sampling strategy                                                                                                   | N/A                                                              |
|                           |         | (e) Describe any sensitivity analyses                                                                                                                                                | N/A                                                              |
| <b>Results</b>            |         |                                                                                                                                                                                      |                                                                  |
| Participants              | 13*     | (a) Report numbers of individuals at each stage of                                                                                                                                   | Methods (Participant                                             |

|                          |     |                                                                                                                                                                                                              |                                                                                                                                         |
|--------------------------|-----|--------------------------------------------------------------------------------------------------------------------------------------------------------------------------------------------------------------|-----------------------------------------------------------------------------------------------------------------------------------------|
|                          |     | study—eg numbers potentially eligible, examined for eligibility, confirmed eligible, included in the study, completing follow-up, and analysed                                                               | recruitment) – p.4-5 ,<br>Results (Sample characteristics, Test-retest reliability) – p.7, p.8-9                                        |
|                          |     | (b) Give reasons for non-participation at each stage                                                                                                                                                         | Cannot comment as no contact with non-responders                                                                                        |
|                          |     | (c) Consider use of a flow diagram                                                                                                                                                                           | N/A                                                                                                                                     |
| Descriptive data         | 14* | (a) Give characteristics of study participants (eg demographic, clinical, social) and information on exposures and potential confounders                                                                     | Results (Sample characteristics) – p.7<br>Table 1 – p.15                                                                                |
|                          |     | (b) Indicate number of participants with missing data for each variable of interest                                                                                                                          | Table 2 – p.16                                                                                                                          |
| Outcome data             | 15* | Report numbers of outcome events or summary measures                                                                                                                                                         | Table 3 – p.17-18,<br>Table 4 – p.19,<br>Figure 1 – p.20                                                                                |
| Main results             | 16  | (a) Give unadjusted estimates and, if applicable, confounder-adjusted estimates and their precision (eg, 95% confidence interval). Make clear which confounders were adjusted for and why they were included | N/A as regression not performed for a survey validation study.                                                                          |
|                          |     | (b) Report category boundaries when continuous variables were categorized                                                                                                                                    | N/A                                                                                                                                     |
|                          |     | (c) If relevant, consider translating estimates of relative risk into absolute risk for a meaningful time period                                                                                             | N/A                                                                                                                                     |
| Other analyses           | 17  | Report other analyses done—eg analyses of subgroups and interactions, and sensitivity analyses                                                                                                               | Results (factor analysis, internal consistency, test-retest reliability, sub-sample comparisons, convergent construct validity) – p.7-9 |
| <b>Discussion</b>        |     |                                                                                                                                                                                                              |                                                                                                                                         |
| Key results              | 18  | Summarise key results with reference to study objectives                                                                                                                                                     | Discussion – p.9-10 (paragraph 1)                                                                                                       |
| Limitations              | 19  | Discuss limitations of the study, taking into account sources of potential bias or imprecision. Discuss both direction and magnitude of any potential bias                                                   | Discussion – p.10 (paragraph 3)                                                                                                         |
| Interpretation           | 20  | Give a cautious overall interpretation of results considering objectives, limitations, multiplicity of analyses, results from similar studies, and other relevant evidence                                   | Discussion – p.10-11 (paragraphs 4-5)                                                                                                   |
| Generalisability         | 21  | Discuss the generalisability (external validity) of the study results                                                                                                                                        | Discussion – p.10-11 (paragraph 5)                                                                                                      |
| <b>Other information</b> |     |                                                                                                                                                                                                              |                                                                                                                                         |
| Funding                  | 22  | Give the source of funding and the role of the funders for the present study and, if applicable, for the original study                                                                                      | Funding – p.11                                                                                                                          |

---

on which the present article is based

---

\*Give information separately for exposed and unexposed groups.

**Note:** An Explanation and Elaboration article discusses each checklist item and gives methodological background and published examples of transparent reporting. The STROBE checklist is best used in conjunction with this article (freely available on the Web sites of PLoS Medicine at <http://www.plosmedicine.org/>, Annals of Internal Medicine at <http://www.annals.org/>, and Epidemiology at <http://www.epidem.com/>). Information on the STROBE Initiative is available at [www.strobe-statement.org](http://www.strobe-statement.org).

For peer review only
